# Supplementary material for: Sandmeyer trifluoromethylthiolation of arenediazonium salts with sodium thiocyanate and Ruppert–Prakash reagent
Source: Royal Society of Chemistry journal article supplement (doi:10.1039/c3sc53076k), 2014-01-01
Supplement: c3sc53076k.pdf [file c3sc53076k.pdf]

## **Sandmeyer Trifluoromethylthiolation of Arenediazonium Salts with Sodium Thiocyanate and Ruppert-Prakash Reagent**

Grégory Danoun, Bilguun Bayarmagnai, Matthias F. Grünberg, and  
Lukas J. Gooßen\*

*FB Chemie – Organische Chemie, TU Kaiserslautern, Erwin-Schrödinger-Str. Geb. 54,  
67663 Kaiserslautern, Germany, Fax: (+49) 631-205-3921, e-mail:  
goossen@chemie.uni-kl.de.*

### **Supporting Information**

|                                                |    |
|------------------------------------------------|----|
| General Methods                                | 2  |
| Synthesis of arenediazonium tetrafluoroborates | 3  |
| Synthesis of trifluoromethyl thioethers        | 5  |
| Spectroscopic data                             | 18 |

## General Methods

The reactions were performed in oven-dried glassware containing a Teflon-coated stirrer bar and dry septum under a nitrogen atmosphere. Acetonitrile was dried by refluxing over  $\text{CaH}_2$  and subsequent fractionally distillation. Three freeze-pump-thaw cycles were performed before the reagents were mixed. All reactions were monitored by TLC (0.20 mm silica gel plates, POLYGRAM<sup>®</sup> SIL G/UV<sub>254</sub>), GC and the yields were determined by <sup>19</sup>F NMR using 1,3-difluorobenzene as internal standard. GC analyses were carried out using a HP-5 capillary column (Phenyl Methyl Siloxane 30 m x 320 x 0.25, 100/2.3-30- 300/3) and a time program beginning with 2 min at 60 °C followed by 30 °C/min ramp to 300 °C, then 3 min at this temp. Column chromatography was performed using a Combi Flash Companion-Chromatography-System (Isco-Systems) and Grace Reveleris packed flash columns (12 g). NMR spectra were obtained on a Bruker AMX 400 system using chloroform-*d* or DMSO-*d*<sub>6</sub> as deuterated solvents, with proton, carbon and fluorine resonances at 400 MHz, 101 MHz and 151 MHz, respectively. Melting points were measured on a Mettler FP 61. Infrared spectra were recorded on a Perkin Elmer Fourier transform spectrometer. Mass spectral data were acquired on a Varian Saturn 2100 T. The high resolution mass (HRMS) was determined on a Finnigan MAT 90 (70 eV) spectrometer.

The diazonium salts were prepared from the corresponding anilines following the procedure below and were directly used. All other starting materials were commercially available. All the anilines and solvents were purified by distillation or sublimation prior to use. The other chemicals were used without further purification.

**Table 1.** Optimization of the reaction conditions.

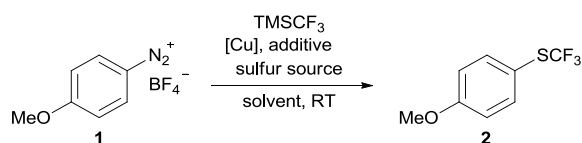

| entry             | [Cu]              | sulfur source       | additive                        | solvent | yield of <b>2</b> [%] <sup>[a]</sup> |
|-------------------|-------------------|---------------------|---------------------------------|---------|--------------------------------------|
| 1 <sup>[b]</sup>  | CuSCN             | S <sub>8</sub>      | CsF                             | MeCN    | 5                                    |
| 2 <sup>[b]</sup>  | "                 | Lawesson's reagent  | "                               | "       | traces                               |
| 3 <sup>[b]</sup>  | "                 | Na <sub>2</sub> S   | "                               | "       | 0                                    |
| 4                 | "                 | NaSCN               | "                               | "       | 30                                   |
| 5                 | "                 | KSCN                | "                               | "       | traces                               |
| 6                 | "                 | NH <sub>4</sub> SCN | "                               | "       | traces                               |
| 7                 | "                 | NaSCN               | Cs <sub>2</sub> CO <sub>3</sub> | "       | 98                                   |
| 8                 | "                 | "                   | "                               | DMF     | 81                                   |
| 9                 | "                 | "                   | "                               | acetone | 18                                   |
| 10                | Cu(0)             | "                   | "                               | MeCN    | 1                                    |
| 11                | CuSO <sub>4</sub> | "                   | "                               | "       | 10                                   |
| 12                | CuOAc             | "                   | "                               | "       | 85                                   |
| 13                | CuI               | "                   | "                               | "       | 6                                    |
| 14                | CuSCN             | "                   | —                               | "       | 0                                    |
| 15                | "                 | —                   | Cs <sub>2</sub> CO <sub>3</sub> | "       | 0                                    |
| 16                | —                 | NaSCN               | "                               | "       | 0                                    |
| 17 <sup>[c]</sup> | CuSCN             | "                   | "                               | "       | 34                                   |
| 18 <sup>[d]</sup> | "                 | "                   | "                               | "       | 98                                   |
| 19 <sup>[e]</sup> | "                 | "                   | "                               | "       | 67                                   |

*Reaction conditions:* 0.5 mmol [Cu], 2 equiv. additive, 1.5 equiv. sulfur source, 2 mL solvent, RT, dropwise addition of 0.5 mmol **1** in 2 mL of solvent, then 2 equiv. TMSCF<sub>3</sub>, 12h. [a] Yields were determined by <sup>19</sup>F NMR using 1,3-difluorobenzene as internal standard. [b] TMSCF<sub>3</sub> added before **1**. [c] 1 equiv. Cs<sub>2</sub>CO<sub>3</sub>. [d] 0.5 equiv. CuSCN. [e] 0.1 equiv. CuSCN., Lawesson's reagent = 2,4-bis(4-methoxyphenyl)-1,3,2,4-dithiadiphosphetane-2,4-dithione.

### Synthesis of arenediazonium tetrafluoroborates

In a 50 mL round-bottom flask, the aniline (10 mmol) was dissolved in a mixture of absolute ethanol (3 mL) and an aqueous solution of HBF<sub>4</sub> (50%, 2.5 mL, 20 mmol) and *tert*-butyl nitrite (2.7 mL, 20 mmol) was added dropwise to the solution at 0 °C. The reaction was stirred at room temperature for 1 h and diethyl ether (20 mL) was added to precipitate the arenediazonium tetrafluoroborate that was filtered off and washed with diethyl ether (3 × 10 mL). The arenediazonium tetrafluoroborate was

dried in vacuo ( $10^{-3}$  mbar) for 10 minutes and was then directly used without further purification.

**Synthesis of 1,3-benzothiazole-2-diazonium tetrafluoroborate** [CAS: 29163-72-2].

Benzothiazole-2-diazonium tetrafluoroborate was prepared from 2-Amino-benzothiazole [CAS: 136-95-8].<sup>1</sup>

## Synthesis of trifluoromethyl thioethers

**Standard procedure for the synthesis of trifluoromethyl thioethers from the corresponding arenediazonium salts.** An oven-dried 20 mL crimp cap vessel with Teflon-coated stirrer bar was charged with copper thiocyanate (61.4 mg, 0.50 mmol), caesium carbonate (652 mg, 2.00 mmol) and sodium thiocyanate (122 mg, 1.50 mmol) and was brought under an atmosphere of dry nitrogen. Acetonitrile (4 mL) was added *via* syringe and the resulting suspension was stirred at room temperature for 10 minutes. A solution of the arenediazonium tetrafluoroborate (1.00 mmol) in acetonitrile (4 mL) was added dropwise *via* syringe and the reaction mixture was stirred for another 10 minutes. Trifluoromethyltrimethylsilane (321  $\mu$ L, 2.00 mmol) was added at once *via* syringe and the mixture was then stirred at ambient temperature for 16 h. The resulting mixture was filtered through a short pad of celite (5 g) and rinsed with diethyl ether (20 mL). The resulting organic solution was washed with water (10 mL) and brine (10 mL). The organic layer was dried over  $\text{MgSO}_4$ , filtered and concentrated (700 mbar, 40  $^\circ\text{C}$ ). The residue was further purified by flash chromatography ( $\text{SiO}_2$ , diethyl ether/hexane gradient), yielding the corresponding trifluoromethyl thioethers.

**Synthesis of 1-methoxy-4-[(trifluoromethyl)thio]benzene (2)** [CAS: 78914-94-0].

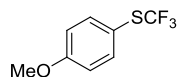

Compound **2** was prepared following the standard procedure, starting from 4-methoxybenzenediazonium tetrafluoroborate [CAS: 459-64-3] (222 mg, 1.00 mmol). After purification, **2** was isolated as colorless liquid (171 mg, 0.82 mmol, 82%). TLC ( $\text{Et}_2\text{O}$ :hexane, 1:4 vol/vol):  $R_f = 0.43$ ;  $^1\text{H}$  NMR (400 MHz,  $\text{CDCl}_3$ ):  $\delta=7.59$  (d,  $^3J(\text{H,H})=8.8$  Hz, 2H), 6.95 (d,  $^3J(\text{H,H})=8.8$  Hz, 2H), 3.85 ppm (s, 3H);  $^{19}\text{F}$  NMR (151 MHz,  $\text{CDCl}_3$ ):  $\delta=-44.0$  ppm;  $^{13}\text{C}$  NMR (101 MHz,  $\text{CDCl}_3$ ):  $\delta=161.8$ , 138.3 (2C), 129.6 (q,

$^1J(\text{C},\text{F})=308.8$  Hz, 1C), 115.0 (2C), 114.8 (q,  $^3J(\text{C},\text{F})=1.8$  Hz, 1C), 55.4 ppm.

**Synthesis of 1-methoxy-2-[(trifluoromethyl)thio]benzene (3)** [CAS: 75168-99-9].

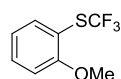

Compound **3** was prepared following the standard procedure, starting from 2-methoxybenzenediazonium tetrafluoroborate [CAS: 492-95-5] (222 mg, 1.00 mmol). After the reaction, 1,3-difluorobenzene as internal standard (100  $\mu\text{L}$ , 1.00 mmol) was added to the reaction mixture and product **3** was formed in 77% yield as determined by  $^{19}\text{F}$  NMR spectroscopic analysis and confirmed by GC-MS analytics.  $^{19}\text{F}$  NMR (151 MHz,  $\text{DMSO}-d_6$ ):  $\delta = -43.3$  ppm.

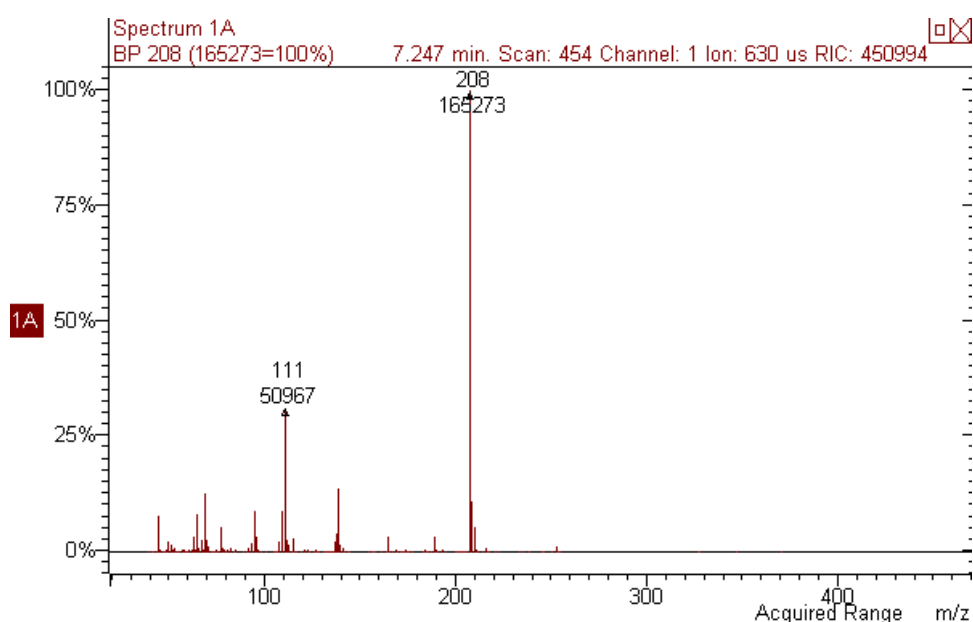

**Synthesis of 4-[(trifluoromethyl)thio]toluene (4)** [CAS: 352-68-1].

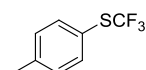

Compound **4** was prepared following the standard procedure, starting from 4-methylbenzenediazonium tetrafluoroborate [CAS: 459-44-9] (206 mg, 1.00 mmol). After the reaction, 1,3-difluorobenzene as internal standard (100  $\mu\text{L}$ , 1.00 mmol) was added to the reaction mixture and

product **4** was formed in 98% yield as determined by  $^{19}\text{F}$  NMR spectroscopic analysis and confirmed by GC-MS analytics.  $^{19}\text{F}$  NMR (151 MHz,  $\text{DMSO-}d_6$ ):  $\delta = -44.0$  ppm.

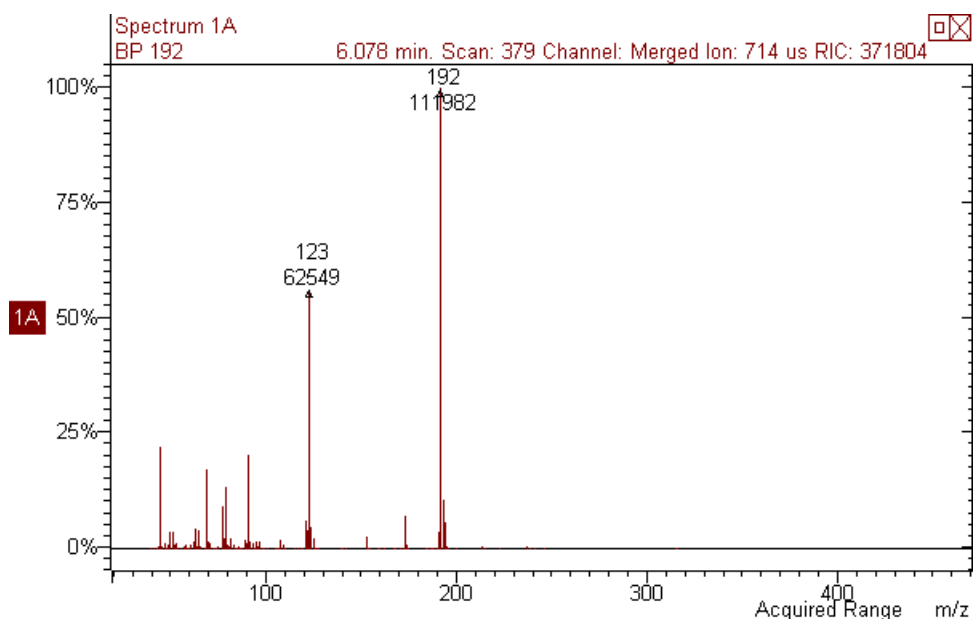

### Synthesis of 3-[(trifluoromethyl)thio]toluene (**5**) [CAS: 705-46-4].

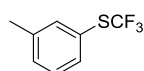

Compound **5** was prepared following the standard procedure, starting from 3-methylbenzenediazonium tetrafluoroborate [CAS: 1422-76-0] (206 mg, 1.00 mmol). After the reaction, 1,3-difluorobenzene as internal standard (100  $\mu\text{L}$ , 1.00 mmol) was added to the reaction mixture and product **5** was formed in 98% yield as determined by  $^{19}\text{F}$  NMR spectroscopic analysis and confirmed by GC-MS analytics.  $^{19}\text{F}$  NMR (151 MHz,  $\text{DMSO-}d_6$ ):  $\delta = -43.6$  ppm.

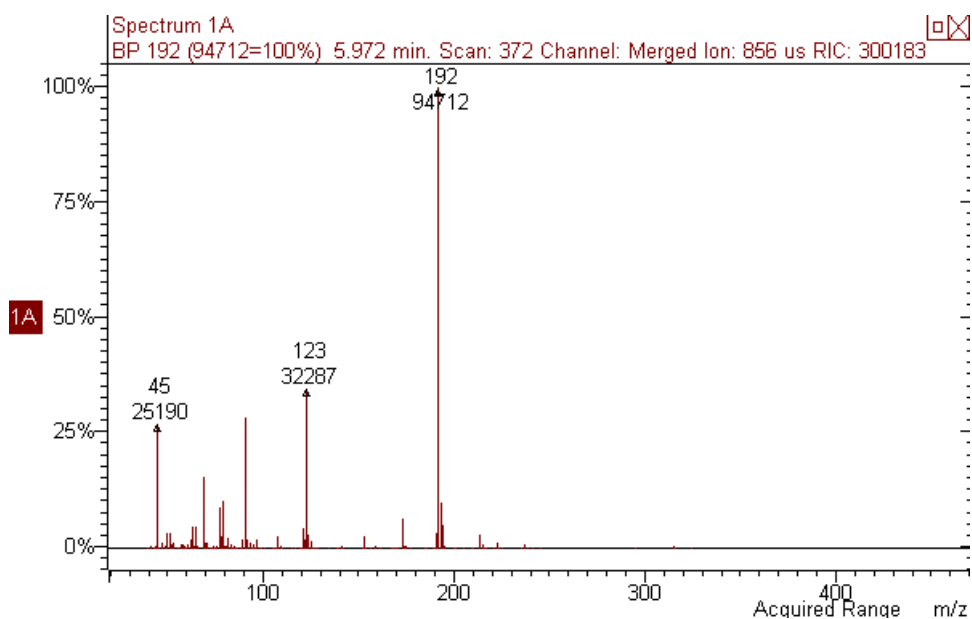

### Synthesis of 2-[(trifluoromethyl)thio]toluene (**6**) [CAS: 1736-75-0].

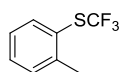

Compound **6** was prepared following the standard procedure, starting from 2-methylbenzenediazonium tetrafluoroborate [CAS: 2093-46-1] (206 mg, 1.00 mmol). After the reaction, 1,3-difluorobenzene as internal standard (100  $\mu$ L, 1.00 mmol) was added to the reaction mixture and product **6** was formed in 92% yield as determined by  $^{19}\text{F}$  NMR spectroscopic analysis and confirmed by GC-MS analytics.  $^{19}\text{F}$  NMR (151 MHz, DMSO- $d_6$ ):  $\delta = -43.3$  ppm.

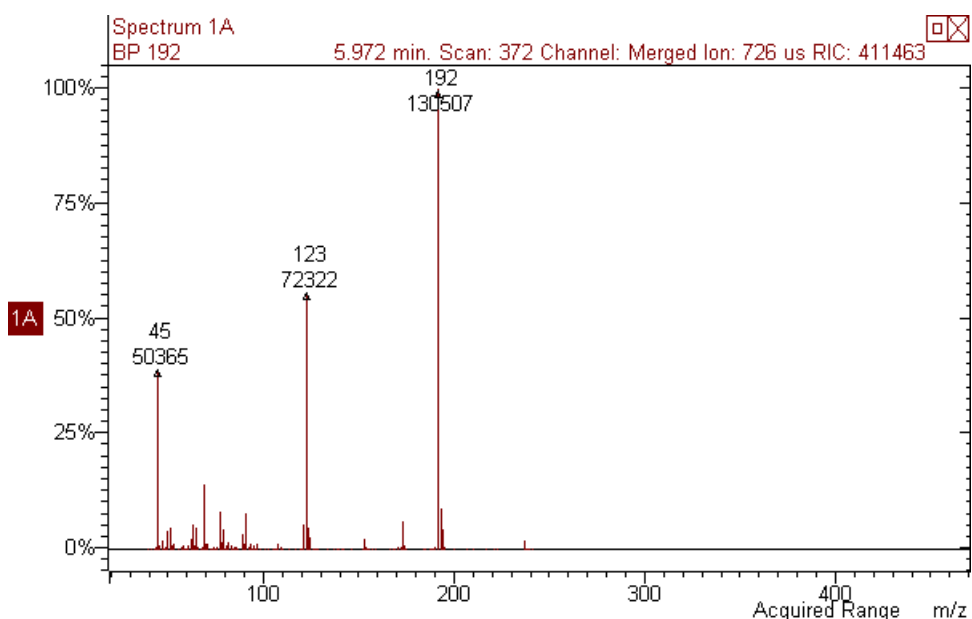



### Synthesis of 4-[(trifluoromethyl)thio]biphenyl (**7**) [CAS: 177551-63-2].

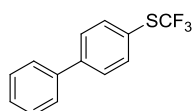

Compound **7** was prepared following the standard procedure, starting from [1,1'-biphenyl]-4-diazonium tetrafluoroborate [CAS: 52053-64-2] (268 mg, 1.00 mmol). After purification, **7** was isolated as colorless solid (187 mg, 0.74 mmol, 74%). TLC (Et<sub>2</sub>O:hexane, 1:4 vol/vol): *R<sub>f</sub>* = 0.57; <sup>1</sup>H NMR (400 MHz, CDCl<sub>3</sub>): δ=7.79 (d, <sup>3</sup>*J*(H,H)=8.3 Hz, 2H), 7.67 (m, 4H), 7.53 (m, 2H), 7.47 ppm (m, 1H); <sup>19</sup>F NMR (151 MHz, CDCl<sub>3</sub>): δ=-42.6 ppm; <sup>13</sup>C NMR (101 MHz, CDCl<sub>3</sub>): δ=143.8, 139.6, 136.7 (2C), 129.6 (q, <sup>1</sup>*J*(C,F)=308.8 Hz, 1C), 128.9 (2C), 128.1, 128.1 (2C), 127.2 (2C), 123.0 ppm (q, <sup>3</sup>*J*(C,F)=1.8 Hz, 1C).

### Synthesis of 4-[(trifluoromethyl)thio]benzonitrile (**8**) [CAS: 332-26-3].

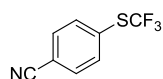

Compound **8** was prepared following the standard procedure, starting from 4-cyanobenzene diazonium tetrafluoroborate [CAS: 2252-32-6] (217 mg, 1.00 mmol). After purification, **8** was isolated as colorless liquid (175 mg, 0.86 mmol, 86%). TLC (Et<sub>2</sub>O:hexane, 1:4 vol/vol): *R<sub>f</sub>* = 0.32; <sup>1</sup>H NMR (400 MHz, CDCl<sub>3</sub>): δ=7.77 (d, <sup>3</sup>*J*(H,H)=8.6 Hz, 2H), 7.71 ppm (d, <sup>3</sup>*J*(H,H)=8.6 Hz, 2H); <sup>19</sup>F NMR (151 MHz, CDCl<sub>3</sub>): δ=-41.5 ppm; <sup>13</sup>C NMR (101 MHz, CDCl<sub>3</sub>): δ=135.9 (2C), 132.9 (2C), 130.5 (q, <sup>3</sup>*J*(C,F)=1.8 Hz, 1C), 129.0 (q, <sup>1</sup>*J*(C,F)=308.8 Hz, 1C), 117.6, 114.6 ppm.

### Synthesis of 3-[(trifluoromethyl)thio]acetophenone (**9**) [CAS: 56773-33-2].

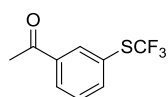

Compound **9** was prepared following the standard procedure, starting from 3-acetylbenzene diazonium tetrafluoroborate [CAS: 59206-56-3] (234 mg, 1.00 mmol). After purification, **9** was isolated as colorless liquid

(136 mg, 0.62 mmol, 62%). TLC (Et<sub>2</sub>O:hexane, 1:4 vol/vol):  $R_f = 0.25$ ; <sup>1</sup>H NMR (400 MHz, CDCl<sub>3</sub>):  $\delta=8.22$  (s, 1H), 8.07 (d, <sup>3</sup> $J(\text{H,H})=7.8$  Hz, 1H), 7.85 (d, <sup>3</sup> $J(\text{H,H})=7.8$  Hz, 1H), 7.54 (t, <sup>3</sup> $J(\text{H,H})=7.8$  Hz, 1H), 2.63 ppm (s, 3H); <sup>19</sup>F NMR (151 MHz, CDCl<sub>3</sub>):  $\delta=-42.5$  ppm; <sup>13</sup>C NMR (101 MHz, CDCl<sub>3</sub>):  $\delta=196.6, 140.4, 138.2, 136.0, 130.5, 129.8, 129.3$  (q, <sup>1</sup> $J(\text{C,F})=307.9$  Hz, 1C), 125.3 (q, <sup>3</sup> $J(\text{C,F})=1.8$  Hz, 1C), 26.6 ppm.

**Synthesis of 4-[(trifluoromethyl)thio]acetophenone (10)** [CAS: 713-67-7].

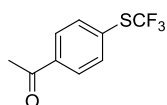

Compound **10** was prepared following the standard procedure, starting from 4-acetylbenzenediazonium tetrafluoroborate [CAS: 350-47-0] (234 mg, 1.00 mmol). After purification, **10** was isolated as colorless liquid (156 mg, 0.71 mmol, 71%). TLC (Et<sub>2</sub>O:hexane, 1:4 vol/vol):  $R_f = 0.25$ ; <sup>1</sup>H NMR (400 MHz, CDCl<sub>3</sub>):  $\delta=7.98$  (d, <sup>3</sup> $J(\text{H,H})=8.2$  Hz, 2H), 7.74 (d, <sup>3</sup> $J(\text{H,H})=8.3$  Hz, 2H), 2.62 ppm (s, 3H); <sup>19</sup>F NMR (151 MHz, CDCl<sub>3</sub>):  $\delta=-41.8$  ppm; <sup>13</sup>C NMR (101 MHz, CDCl<sub>3</sub>):  $\delta=197.0, 138.4, 135.7$  (2C), 129.9 (q, <sup>3</sup> $J(\text{C,F})=1.8$  Hz, 1C), 129.2 (q, <sup>1</sup> $J(\text{C,F})=308.8$  Hz, 1C), 129.0 (2C), 26.6 ppm.

**Synthesis of 4-[(trifluoromethyl)thio]benzophenone (11)** [CAS: 41830-99-3].

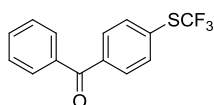

Compound **11** was prepared following the standard procedure, starting from 4-benzoylbenzenediazonium tetrafluoroborate [CAS: 38246-74-1] (296 mg, 1.00 mmol). After purification, **11** was isolated as colorless solid (165 mg, 0.59 mmol, 59%). TLC (Et<sub>2</sub>O:hexane, 1:4 vol/vol):  $R_f = 0.41$ ; <sup>1</sup>H NMR (400 MHz, CDCl<sub>3</sub>):  $\delta=7.81$  (m, 6H), 7.62 (m, 1H), 7.51 ppm (m, 2H); <sup>19</sup>F NMR (151 MHz, CDCl<sub>3</sub>):  $\delta=-41.8$  ppm; <sup>13</sup>C NMR (101 MHz, CDCl<sub>3</sub>):  $\delta=195.5, 139.4, 136.7, 135.5$  (2C), 132.9, 130.6 (2C), 130.0 (2C),

129.3 (q,  $^1J(\text{C},\text{F})=308.8$  Hz, 1C), 129.0 (q,  $^3J(\text{C},\text{F})=1.8$  Hz, 1C), 128.4 ppm (2C).

**Synthesis of methyl 4-[(trifluoromethyl)thio]benzoate (12)** [CAS: 88489-60-5].

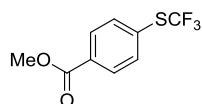

Compound **12** was prepared following the standard procedure, starting from 4-(methoxycarbonyl)benzenediazonium tetrafluoroborate [CAS: 369-48-2] (250 mg, 1.00 mmol). After purification, **12** was isolated as colorless liquid (187 mg, 0.79 mmol, 79%). TLC (Et<sub>2</sub>O:hexane, 1:4 vol/vol):  $R_f = 0.37$ ;  $^1\text{H}$  NMR (400 MHz, CDCl<sub>3</sub>):  $\delta=8.06$  (d,  $^3J(\text{H},\text{H})=8.5$  Hz, 2H), 7.71 (d,  $^3J(\text{H},\text{H})=8.3$  Hz, 2H), 3.93 ppm (s, 3H);  $^{19}\text{F}$  NMR (151 MHz, CDCl<sub>3</sub>):  $\delta=-41.9$  ppm;  $^{13}\text{C}$  NMR (101 MHz, CDCl<sub>3</sub>):  $\delta=166.9$ , 135.5 (2C), 132.1, 130.4 (2C), 129.8 (q,  $^3J(\text{C},\text{F})=1.8$  Hz, 1C), 129.3 (q,  $^1J(\text{C},\text{F})=308.8$  Hz, 1C), 52.4 ppm.

**Synthesis of *N,N*-dimethyl-4-[(trifluoromethyl)thio]aniline (13)** [CAS: 2677-71-6].

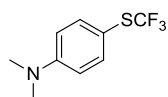

Compound **13** was prepared following the standard procedure, starting from 4-(dimethylamino)benzenediazonium tetrafluoroborate [CAS: 24564-52-1] (235 mg, 1.00 mmol). After purification, **13** was isolated as colorless liquid (183 mg, 0.83 mmol, 83%). TLC (Et<sub>2</sub>O:hexane, 1:4 vol/vol):  $R_f = 0.40$ ;  $^1\text{H}$  NMR (400 MHz, CDCl<sub>3</sub>):  $\delta=7.51$  (d,  $^3J(\text{H},\text{H})=8.8$  Hz, 2H), 6.70 (d,  $^3J(\text{H},\text{H})=8.8$  Hz, 2H), 3.03 ppm (s, 6H);  $^{19}\text{F}$  NMR (151 MHz, CDCl<sub>3</sub>):  $\delta=-44.7$  ppm;  $^{13}\text{C}$  NMR (101 MHz, CDCl<sub>3</sub>):  $\delta=151.9$ , 137.9 (2C), 129.8 (q,  $^1J(\text{C},\text{F})=308.8$  Hz, 1C), 112.3 (2C), 108.2 (q,  $^3J(\text{C},\text{F})=1.8$  Hz, 1C), 40.0 ppm (2C).

### Synthesis of 1-chloro-4-[(trifluoromethyl)thio]benzene (**14**) [CAS: 407-16-9].

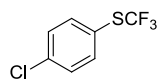

Compound **14** was prepared following the standard procedure, starting from 4-chlorobenzenediazonium tetrafluoroborate [CAS: 673-41-6] (226 mg, 1.00 mmol). After the reaction, 1,3-difluorobenzene as internal standard (100  $\mu$ L, 1.00 mmol) was added to the reaction mixture and product **14** was formed in 98% yield as determined by  $^{19}\text{F}$  NMR spectroscopic analysis and confirmed by GC-MS analytics.  $^{19}\text{F}$  NMR (151 MHz,  $\text{DMSO-}d_6$ ):  $\delta = -43.7$  ppm.

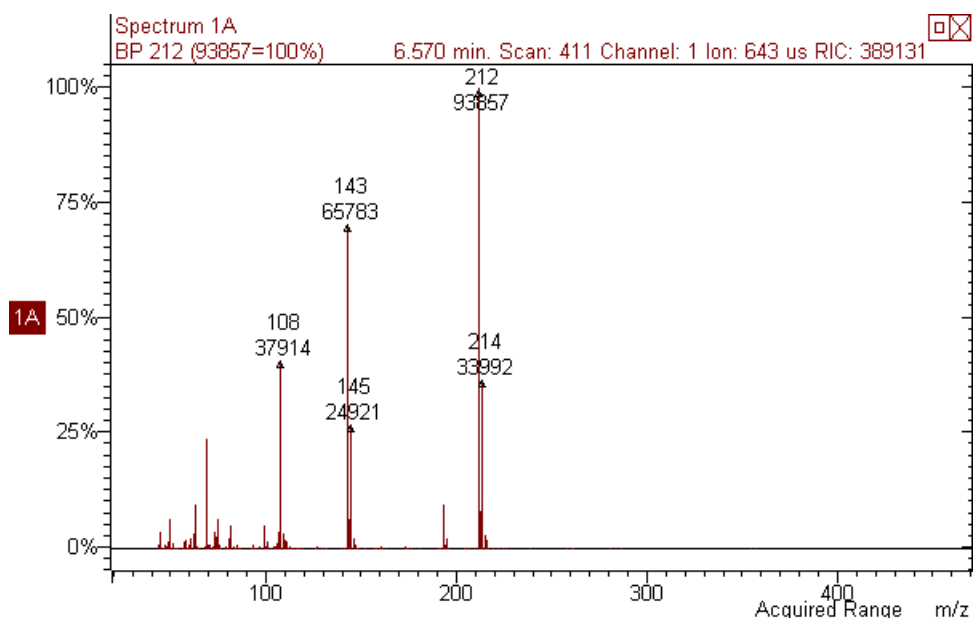

### Synthesis of 1-bromo-4-[(trifluoromethyl)thio]naphthalene (**15**).

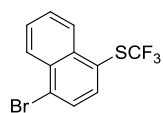

Compound **15** was prepared following the standard procedure, starting from 4-bromonaphthalen-1-yl diazonium tetrafluoroborate [CAS: 341-89-9] (321 mg, 1.00 mmol). After purification, **15** was isolated as colorless liquid (227 mg, 0.74 mmol, 74%). TLC ( $\text{Et}_2\text{O}$ :hexane, 1:4 vol/vol):  $R_f = 0.62$ ;  $^1\text{H}$  NMR (400 MHz,  $\text{CDCl}_3$ ):  $\delta = 8.57$  (m, 1H), 8.32 (m, 1H), 7.81 (m, 2H), 7.69 ppm (m, 2H);  $^{19}\text{F}$  NMR (151 MHz,  $\text{CDCl}_3$ ):  $\delta = -42.1$  ppm;

$^{13}\text{C}$  NMR (101 MHz,  $\text{CDCl}_3$ ):  $\delta$ =137.5, 136.1, 132.7, 129.7, 129.2 (q,  $^1J(\text{C},\text{F})=309.7$  Hz, 1C), 128.4, 128.1, 128.0, 127.9, 126.4, 121.6 ppm (q,  $^3J(\text{C},\text{F})=1.8$  Hz, 1C); IR (NaCl):  $\nu$ =3073 (w), 1497 (s), 1370 (m), 1158 (s), 1146 (s), 1130 (vs), 1110 (vs), 976 (s), 828 (m), 760  $\text{cm}^{-1}$  (s); MS (70 eV):  $m/z$  (%): 308 (12), 307 (100) [ $M^+$ ], 239 (66), 237 (57), 158 (46), 114 (15), 69 (22); HRMS-EI (TOF) ( $m/z$ ): [ $M^+$ ] calcd for  $\text{C}_{11}\text{H}_6^{79}\text{Br}_1\text{F}_3^{32}\text{S}_1$ , 305.9320; found, 305.9336.

### Synthesis of 1-iodo-4-[(trifluoromethyl)thio]benzene (**16**) [CAS: 372-15-6].

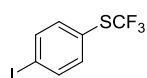

Compound **16** was prepared following the standard procedure, starting from 4-iodobenzene diazonium tetrafluoroborate [CAS: 1514-50-7] (318 mg, 1.00 mmol). After chromatography, **16** was obtained as colorless liquid (238 mg, 0.78 mmol, 78%) which contained traces of iodobenzene. TLC ( $\text{Et}_2\text{O}$ :hexane, 1:4 vol/vol):  $R_f$  = 0.61;  $^1\text{H}$  NMR (400 MHz,  $\text{CDCl}_3$ ):  $\delta$ =7.63 (d,  $^3J(\text{H},\text{H})=8.5$  Hz, 2H), 7.23 ppm (d,  $^3J(\text{H},\text{H})=8.3$  Hz, 2H);  $^{19}\text{F}$  NMR (151 MHz,  $\text{CDCl}_3$ ):  $\delta$ =-42.6 ppm;  $^{13}\text{C}$  NMR (101 MHz,  $\text{CDCl}_3$ ):  $\delta$ =138.7 (2C), 137.7 (2C), 129.1 (q,  $^1J(\text{C},\text{F})=308.8$  Hz, 1C), 124.1 (q,  $^3J(\text{C},\text{F})=1.8$  Hz, 1C), 98.0 ppm.

### Synthesis of 3-[(trifluoromethyl)thio]benzoic acid (**17**) [CAS: 946-65-6].

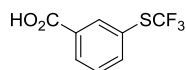

Compound **17** was prepared following the standard procedure, starting from 3-carboxybenzene diazonium tetrafluoroborate [CAS: 20873-47-6] (236 mg, 1.00 mmol). After chromatography, **17** was obtained as colorless solid (52 mg, 0.23 mmol, 23%) which contained 5% of benzoic acid. TLC ( $\text{Et}_2\text{O}$ :hexane, 1:4 vol/vol):  $R_f$  = 0.05;  $^1\text{H}$  NMR (400 MHz,  $\text{CDCl}_3$ ):  $\delta$ =8.43 (bs, 1H), 8.26 (dt,  $^{3,4}J(\text{H},\text{H})=7.9, 1.4$  Hz, 1H), 7.93 (d,  $^3J(\text{H},\text{H})=7.8$  Hz, 1H), 7.59 ppm (d,  $^3J(\text{H},\text{H})=7.8$  Hz, 1H);  $^{19}\text{F}$  NMR (151 MHz,  $\text{CDCl}_3$ ):  $\delta$ =-42.4 ppm;  $^{13}\text{C}$  NMR (101 MHz,  $\text{CDCl}_3$ ):  $\delta$ =170.9, 141.4,

137.9, 132.5, 130.8, 129.8, 129.4 (q,  $^1J(\text{C},\text{F})=308.8$  Hz, 1C), 125.4 ppm (q,  $^3J(\text{C},\text{F})=2.2$  Hz, 1C).

**Synthesis of 3-[(trifluoromethyl)thio]quinoline (18)** [CAS: 1333415-90-9].

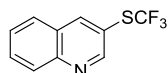

Compound **18** was prepared following the standard procedure, starting from quinoline-3-diazonium tetrafluoroborate [CAS: 398-41-4] (243 mg, 1.00 mmol). After purification, **18** was isolated as colorless solid (142 mg, 0.62 mmol, 62%). TLC (Et<sub>2</sub>O:hexane, 1:4 vol/vol):  $R_f = 0.13$ ;  $^1\text{H}$  NMR (400 MHz, CDCl<sub>3</sub>):  $\delta=9.03$  (d,  $^4J(\text{H},\text{H})=2.3$  Hz, 1H), 8.50 (d,  $^4J(\text{H},\text{H})=2.0$  Hz, 1H), 8.15 (m, 1H), 7.82 (m, 2H), 7.62 ppm (m, 1H);  $^{19}\text{F}$  NMR (151 MHz, CDCl<sub>3</sub>):  $\delta=-43.3$  ppm;  $^{13}\text{C}$  NMR (101 MHz, CDCl<sub>3</sub>):  $\delta=154.5, 148.3, 144.7, 131.6, 129.5, 129.1$  (q,  $^1J(\text{C},\text{F})=308.8$  Hz, 1C), 128.0, 127.7, 127.7, 118.2 ppm (q,  $^3J(\text{C},\text{F})=1.8$  Hz, 1C).

**Synthesis of 6-[(trifluoromethyl)thio]quinoline (19).**

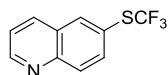

Compound **19** was prepared following the standard procedure, starting from quinoline-6-diazonium tetrafluoroborate [CAS: 2366-78-1] (243 mg, 1.00 mmol). After purification, **19** was isolated as colorless solid (125 mg, 0.55 mmol, 55%). m.p. 54.4 °C; TLC (Et<sub>2</sub>O:hexane, 1:4 vol/vol):  $R_f = 0.08$ ;  $^1\text{H}$  NMR (400 MHz, CDCl<sub>3</sub>):  $\delta=9.02$  (br. s, 1H), 8.17 (m, 3H), 7.9 (dd,  $^{3,4}J(\text{H},\text{H})=8.5, 1.8$  Hz, 1H), 7.49 ppm (dd,  $^{3,4}J(\text{H},\text{H})=8.0, 4.0$  Hz, 1H);  $^{19}\text{F}$  NMR (151 MHz, CDCl<sub>3</sub>):  $\delta=-42.3$  ppm;  $^{13}\text{C}$  NMR (101 MHz, CDCl<sub>3</sub>):  $\delta=152.2, 148.6, 136.7, 136.2, 135.4, 130.9, 129.5$  (q,  $^1J(\text{C},\text{F})=308.8$  Hz, 1C), 128.3, 122.7 (q,  $^3J(\text{C},\text{F})=1.8$  Hz, 1C), 122.1 ppm; IR (KBr):  $\nu=1489$  (m), 1158 (vs), 1132 (vs), 1116 (vs), 1106 (vs), 1070 (s), 894 (s), 836 (vs), 794 (s), 754 cm<sup>-1</sup> (s); MS (70 eV):  $m/z$  (%): 230 (5), 229 (100) [ $M^+$ ], 160 (46), 116 (21), 89 (11), 69 (16), 63 (5); HRMS-EI (TOF) ( $m/z$ ): [ $M^+$ ] calcd for C<sub>10</sub>H<sub>6</sub>N<sub>1</sub>F<sub>3</sub><sup>32</sup>S<sub>1</sub>, 229.0168; found, 229.0165.

### Synthesis of 8-[(trifluoromethyl)thio]quinoline (20).

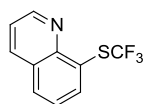

Compound **20** was prepared following the standard procedure, starting from quinoline-8-diazonium tetrafluoroborate [CAS: 27388-19-8] (243 mg, 1.00 mmol). After purification, **20** was isolated as colorless liquid (72 mg, 0.31 mmol, 31%). TLC (Et<sub>2</sub>O:hexane, 1:4 vol/vol):  $R_f = 0.15$ ; <sup>1</sup>H NMR (400 MHz, CDCl<sub>3</sub>):  $\delta=9.02$  (dd, <sup>3,4</sup> $J(\text{H,H})=4.2, 1.7$  Hz, 1H), 8.20 (dd, <sup>3,4</sup> $J(\text{H,H})=8.3, 1.7$  Hz, 1H), 8.08 (d, <sup>3</sup> $J(\text{H,H})=7.3$  Hz, 1H), 7.88 (m, 1H), 7.63–7.45 ppm (m, 2H); <sup>19</sup>F NMR (151 MHz, CDCl<sub>3</sub>):  $\delta=-41.1$  ppm; <sup>13</sup>C NMR (101 MHz, CDCl<sub>3</sub>):  $\delta=150.7, 146.7, 136.5, 134.0, 129.9$  (q, <sup>1</sup> $J(\text{C,F})=308.8$  Hz, 1C), 129.6, 128.8, 126.9 (q, <sup>3</sup> $J(\text{C,F})=1.8$  Hz, 1C), 126.6, 122.1 ppm; IR (NaCl):  $\nu=1607$  (m), 1595 (m), 1491 (s), 1459 (m), 1306 (w), 1108 (vs), 980 (m), 822 (m), 788 (m), 756 cm<sup>-1</sup> (w); MS (70 eV):  $m/z$  (%): 230 (5), 229 (100) [ $M^+$ ], 161 (6), 160 (48), 116 (21), 89 (11), 69 (13); HRMS-EI (TOF) ( $m/z$ ): [ $M^+$ ] calcd for C<sub>10</sub>H<sub>6</sub>N<sub>1</sub>F<sub>3</sub><sup>32</sup>S<sub>1</sub>, 229.0166; found, 229.0168.

### Synthesis of 9-ethyl-3-[(trifluoromethyl)thio]-9H-carbazole (21).

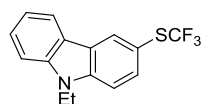

Compound **21** was prepared following the standard procedure, starting from 9-ethyl-9H-carbazol-3-diazonium tetrafluoroborate [CAS: 115771-91-0] (309 mg, 1.00 mmol). After purification, **21** was isolated as colorless solid (195 mg, 0.66 mmol, 66%). m.p. 71.6 °C; TLC (Et<sub>2</sub>O:hexane, 1:4 vol/vol):  $R_f = 0.26$ ; <sup>1</sup>H NMR (400 MHz, CDCl<sub>3</sub>):  $\delta=8.45$  (d, <sup>4</sup> $J(\text{H,H})=1.8$  Hz, 1H), 8.15 (d, <sup>3</sup> $J(\text{H,H})=7.8$  Hz, 1H), 7.78 (dd, <sup>3,4</sup> $J(\text{H,H})=8.5, 1.8$  Hz, 1H), 7.57 (m, 1H), 7.44 (d, <sup>3</sup> $J(\text{H,H})=8.3$  Hz, 1H), 7.41 (d, <sup>3</sup> $J(\text{H,H})=8.5$  Hz, 1H), 7.35 (d, <sup>3,4</sup> $J(\text{H,H})=7.5, 0.9$  Hz, 1H), 4.32 (q, <sup>3</sup> $J(\text{H,H})=7.2$  Hz, 2H), 1.45 ppm (t, <sup>3</sup> $J(\text{H,H})=7.2$  Hz, 3H); <sup>19</sup>F NMR (151 MHz, CDCl<sub>3</sub>):  $\delta=-43.9$  ppm; <sup>13</sup>C NMR (101 MHz, CDCl<sub>3</sub>):  $\delta=141.0, 140.3, 133.7, 130.0$  (q, <sup>1</sup> $J(\text{C,F})=308.8$  Hz, 1C), 129.5, 126.6, 123.8, 122.1, 120.6,

119.7, 112.4 (q,  $^3J(\text{C},\text{F})=1.8$  Hz, 1C), 109.2, 108.8, 37.6, 13.7 ppm. IR (KBr):  $\nu=2975$  (w), 1475 (s), 1449 (s), 1234 (s), 1134 (vs), 1124 (vs), 1108 (vs), 744 (vs), 722 (vs),  $604\text{ cm}^{-1}$  (s); MS (70 eV):  $m/z$  (%): 296 (6), 295 (100) [ $M^+$ ], 281 (5), 280 (31), 227 (7), 226 (47), 69 (14); HRMS-EI (TOF) ( $m/z$ ): [ $M^+$ ] calcd for  $\text{C}_{15}\text{H}_{12}\text{N}_1\text{F}_3^{32}\text{S}_1$ , 295.0637; found, 295.0636.

### Synthesis of methyl 3-[(trifluoromethyl)thio]thiophene-2-carboxylate (**22**).

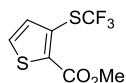

Compound **22** was prepared following the standard procedure, starting from 2-(methoxycarbonyl)thiophene-3-diazonium tetrafluoroborate [CAS: 100421-50-9] (256 mg, 1.00 mmol). After purification, **22** was isolated as colorless liquid (142 mg, 0.59 mmol, 59%). TLC ( $\text{Et}_2\text{O}$ :hexane, 1:4 vol/vol):  $R_f = 0.33$ ;  $^1\text{H}$  NMR (400 MHz,  $\text{CDCl}_3$ ):  $\delta=7.60$  (d,  $^3J(\text{H},\text{H})=5.3$  Hz, 1H), 7.25 (dq,  $^3J(\text{H},\text{H})=5.3$  Hz,  $^5J(\text{H},\text{F})=1.4$  Hz, 1H), 3.91 ppm (s, 3H);  $^{19}\text{F}$  NMR (151 MHz,  $\text{CDCl}_3$ ):  $\delta=-41.4$  ppm;  $^{13}\text{C}$  NMR (101 MHz,  $\text{CDCl}_3$ ):  $\delta=161.7$ , 131.7, 130.6 (q,  $^3J(\text{C},\text{F})=1.8$  Hz, 1C), 129.6 (q,  $^1J(\text{C},\text{F})=308.8$  Hz, 1C), 129.2 (q,  $^3J(\text{C},\text{F})=1.8$  Hz, 1C), 128.4, 52.5 ppm; IR (NaCl):  $\nu=3105$  (m), 2957 (s), 1701 (vs), 1501 (s), 1439 (s), 1407 (s), 1274 (s), 1152 (s), 1136 (s),  $1106\text{ cm}^{-1}$  (s); MS (70 eV):  $m/z$  (%): 243 (10), 241 (100) [ $M^+$ ], 211 (50), 173 (42), 143 (11), 142 (15), 69 (23); HRMS-EI (TOF) ( $m/z$ ): [ $M^+$ ] calcd for  $\text{C}_7\text{H}_5\text{O}_2\text{F}_3^{32}\text{S}_2$ , 241.9675; found, 241.9678.

### Synthesis of 2-[(Trifluoromethyl)thio]benzothiazole (**23**) [CAS: 63647-63-2].

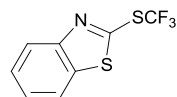

Compound **23** was prepared following the standard procedure, starting from 1,3-benzothiazole-2-diazonium tetrafluoroborate [CAS: 29163-72-2] (249 mg, 1.00 mmol). After purification, **23** was isolated as colorless solid (98 mg, 0.42 mmol, 42%). TLC ( $\text{Et}_2\text{O}$ :hexane, 1:4 vol/vol):  $R_f = 0.40$ ;  $^1\text{H}$  NMR (400 MHz,  $\text{CDCl}_3$ ):  $\delta=8.15$  (d,  $^3J(\text{H},\text{H})=8.0$  Hz, 1H), 7.91



(d,  $^3J(\text{H,H})=8.03$  Hz, 1H), 7.54 ppm (m, 2H);  $^{19}\text{F}$  NMR (151 MHz,  $\text{CDCl}_3$ ):  
 $\delta=-40.2$  ppm;  $^{13}\text{C}$  NMR (101 MHz,  $\text{CDCl}_3$ ):  $\delta=153.1$ , 151.7 (q,  
 $^3J(\text{C,F})=2.7$  Hz, 1C), 137.9, 129.7 (q,  $^1J(\text{C,F})=310.6$  Hz, 1C), 127.0,  
126.7, 124.1, 121.3 ppm.

## Spectroscopic data

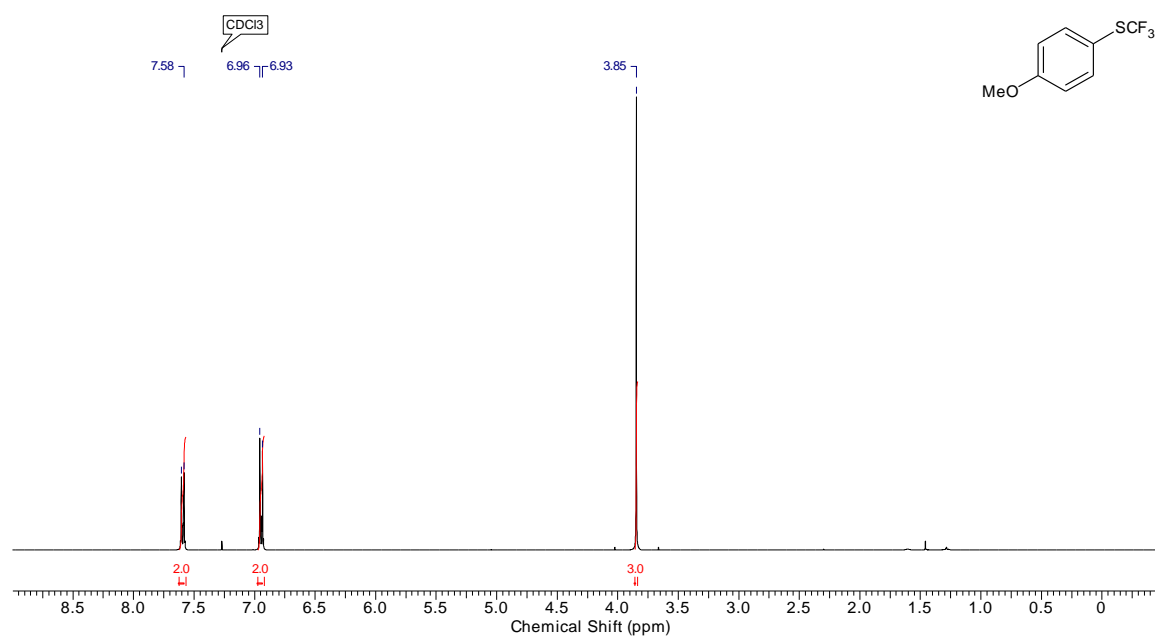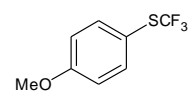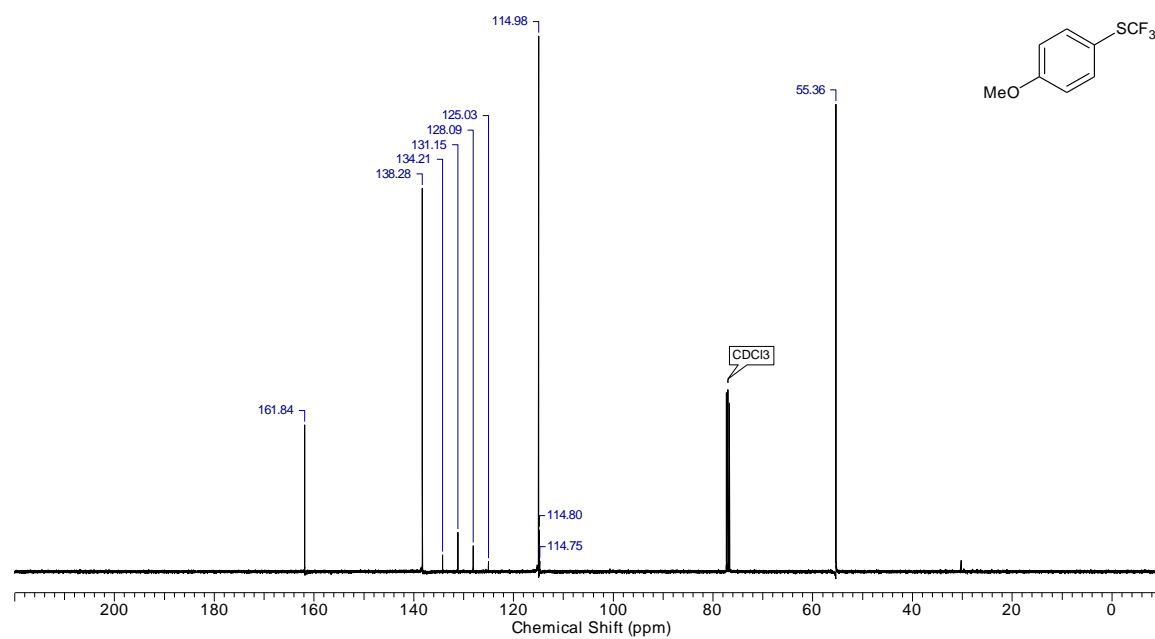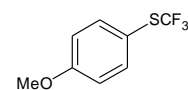

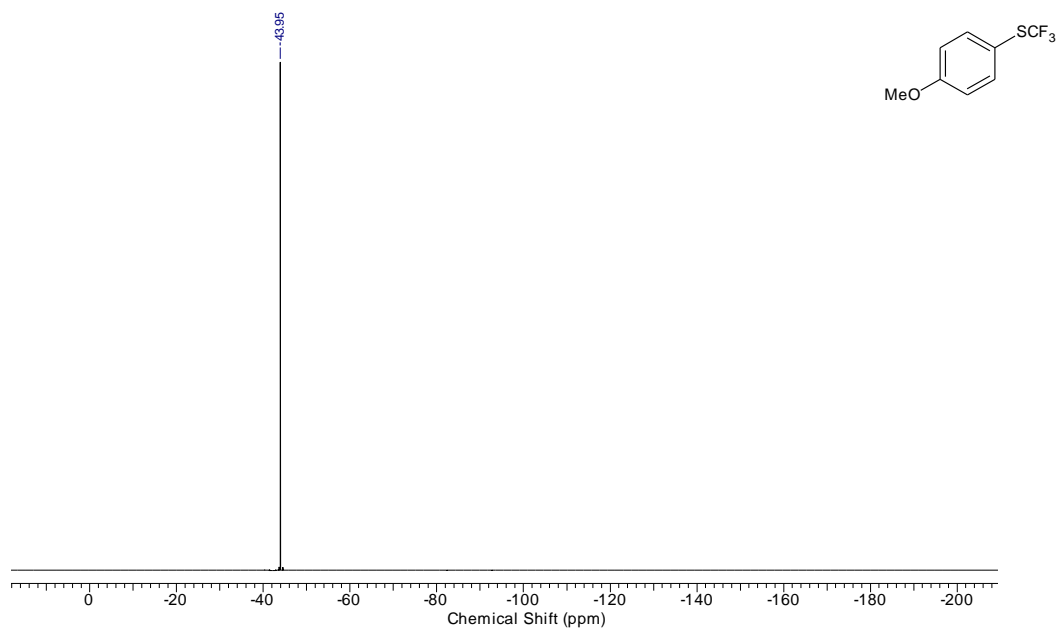

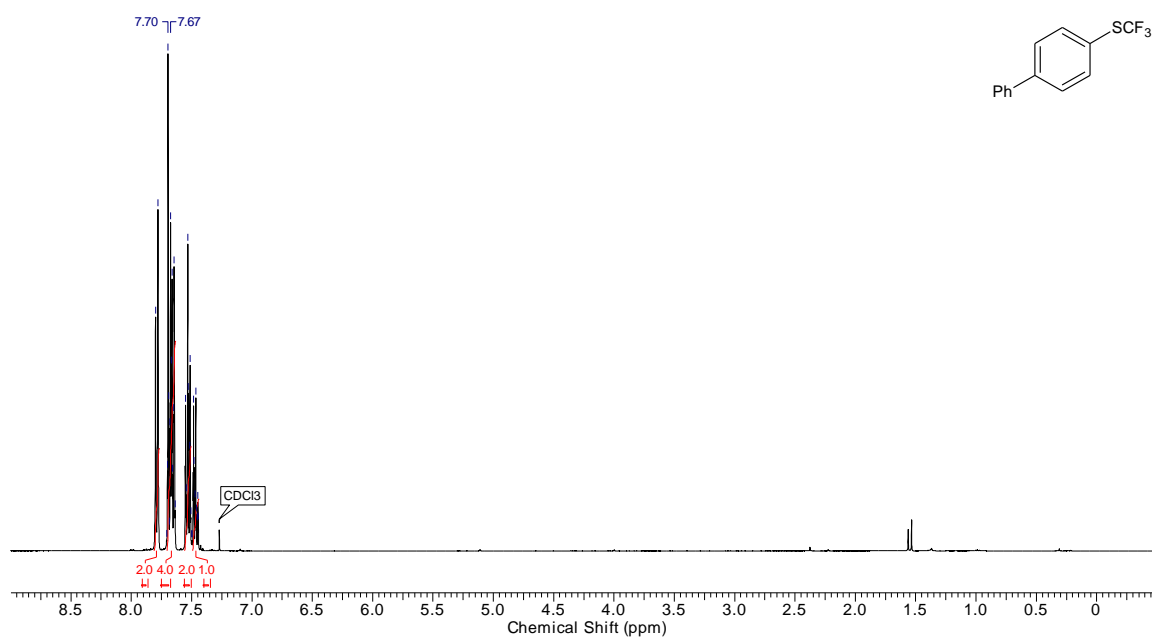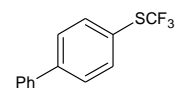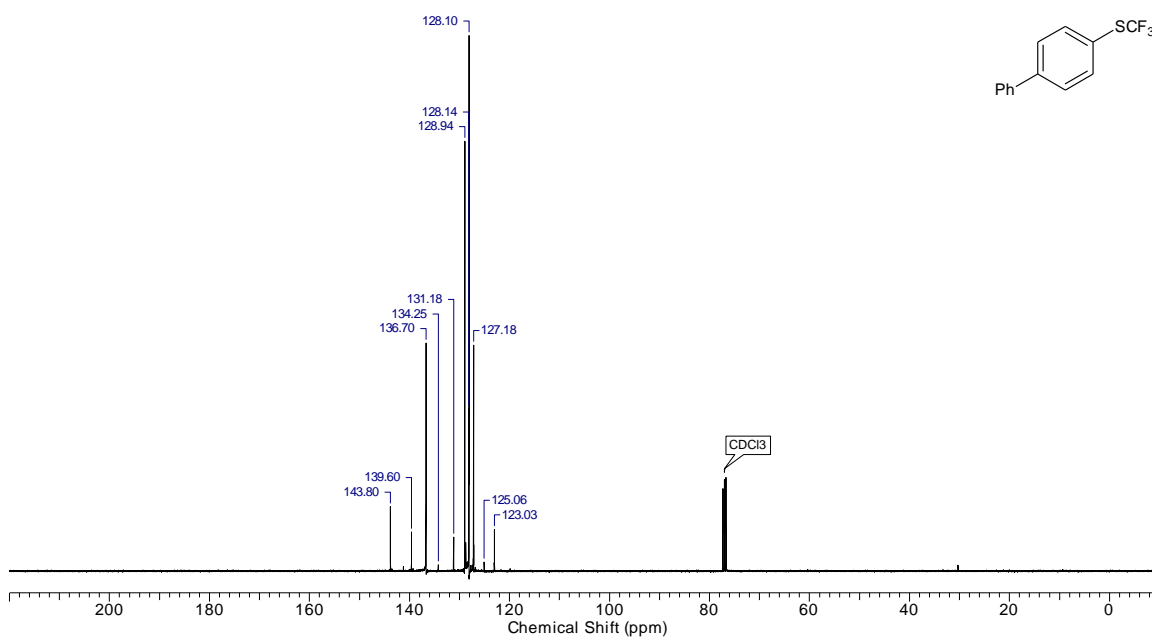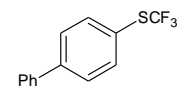

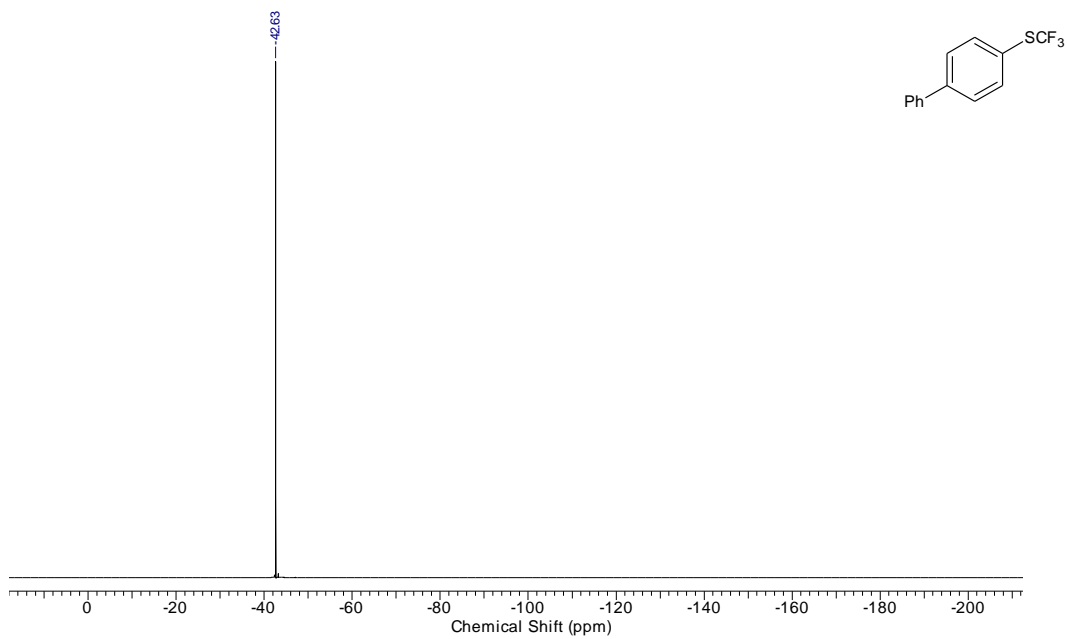

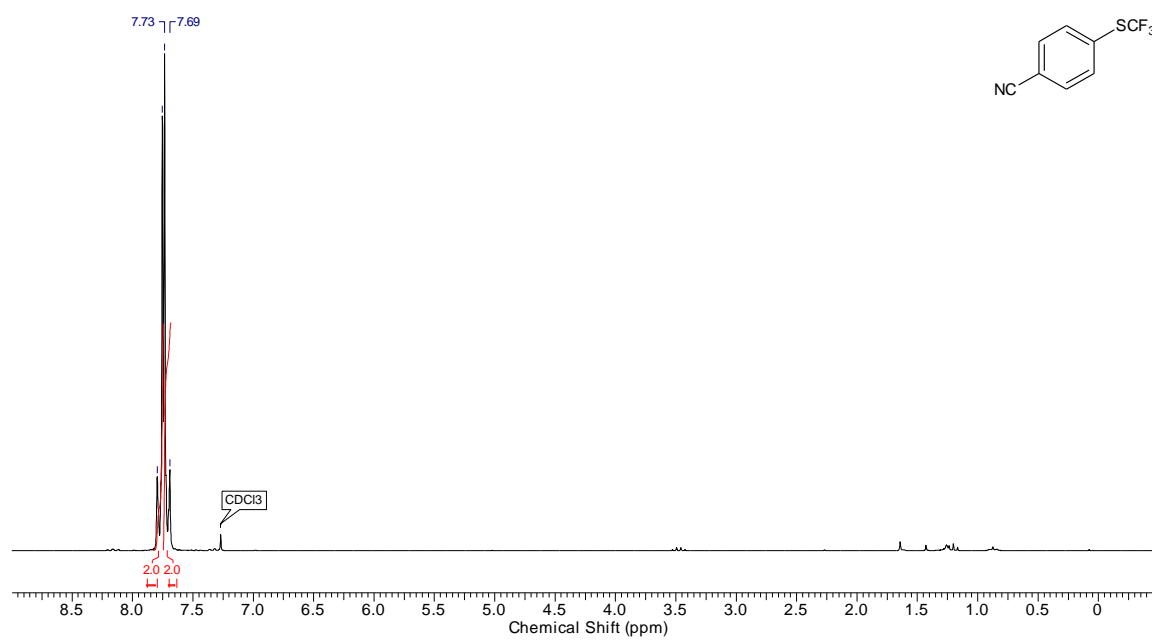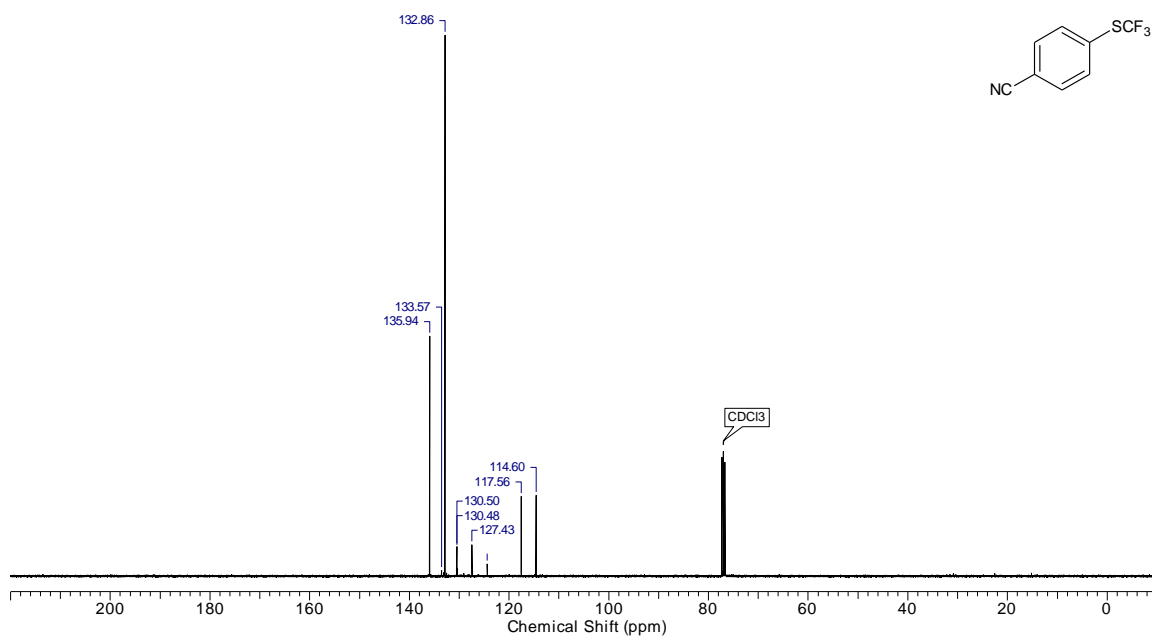

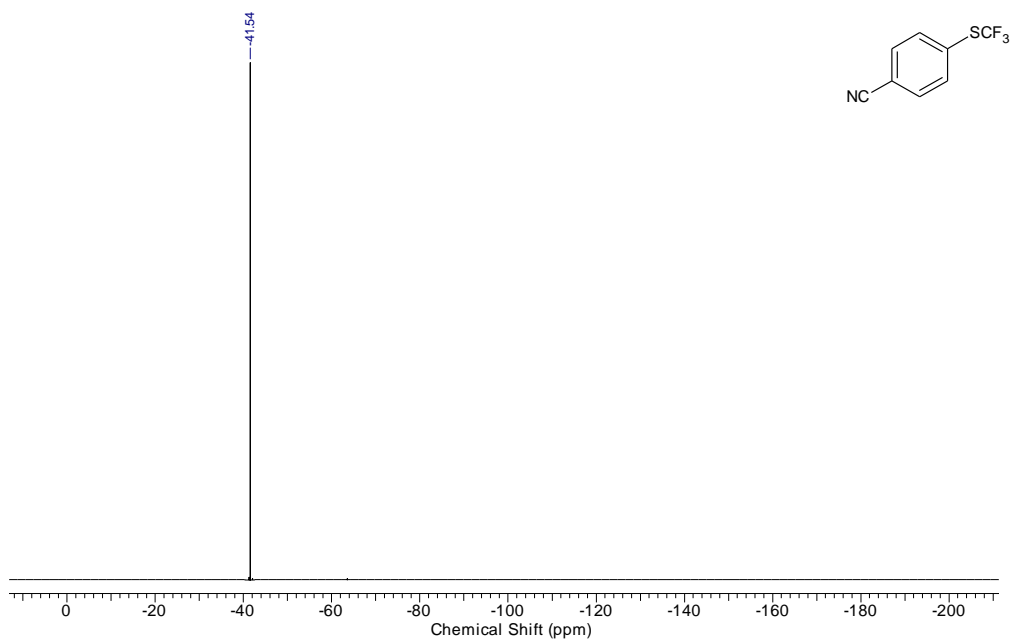

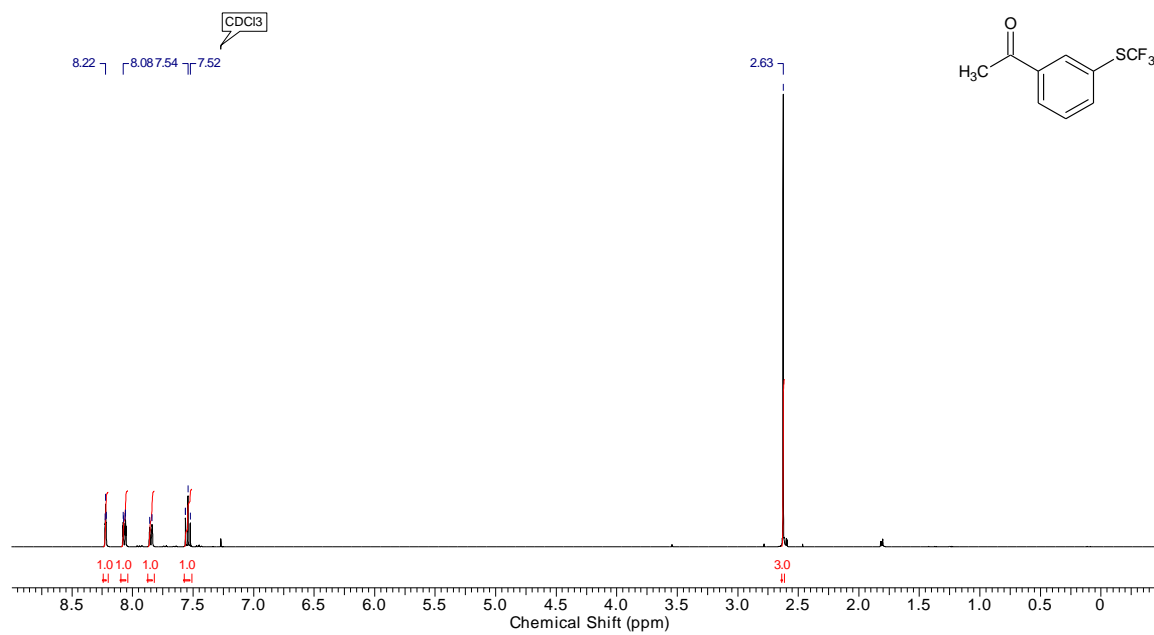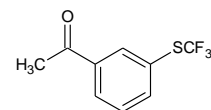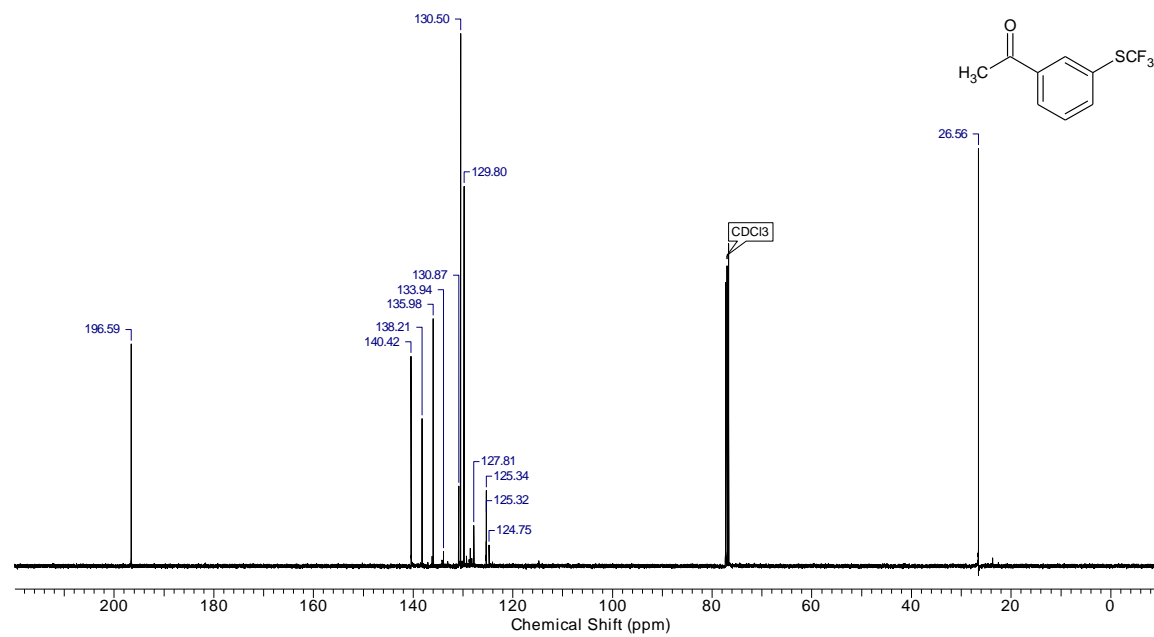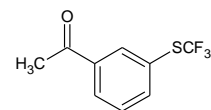



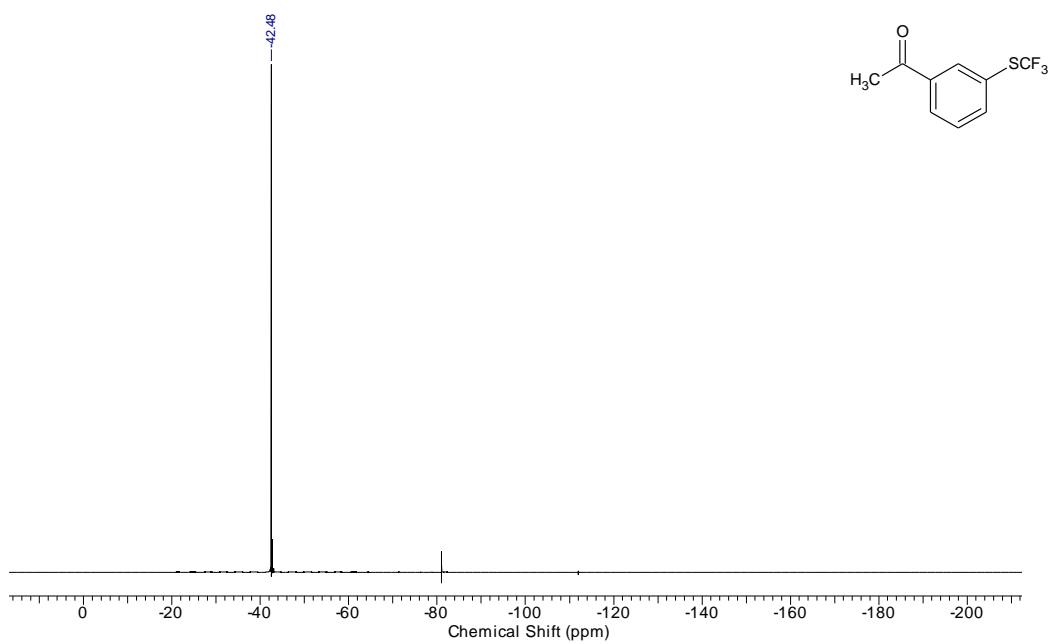

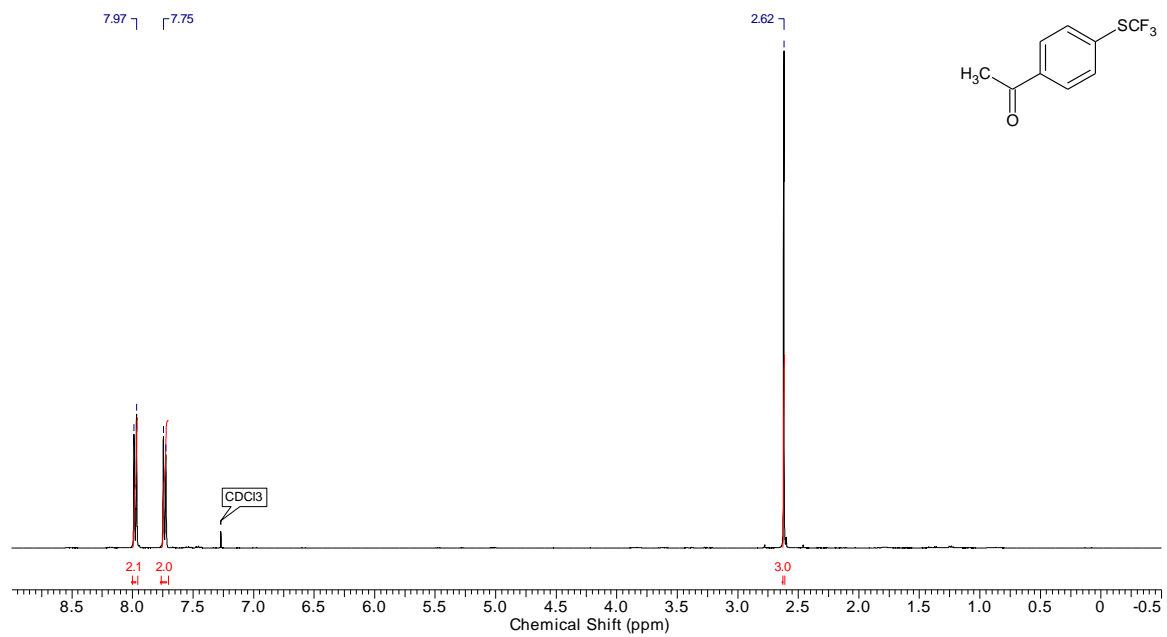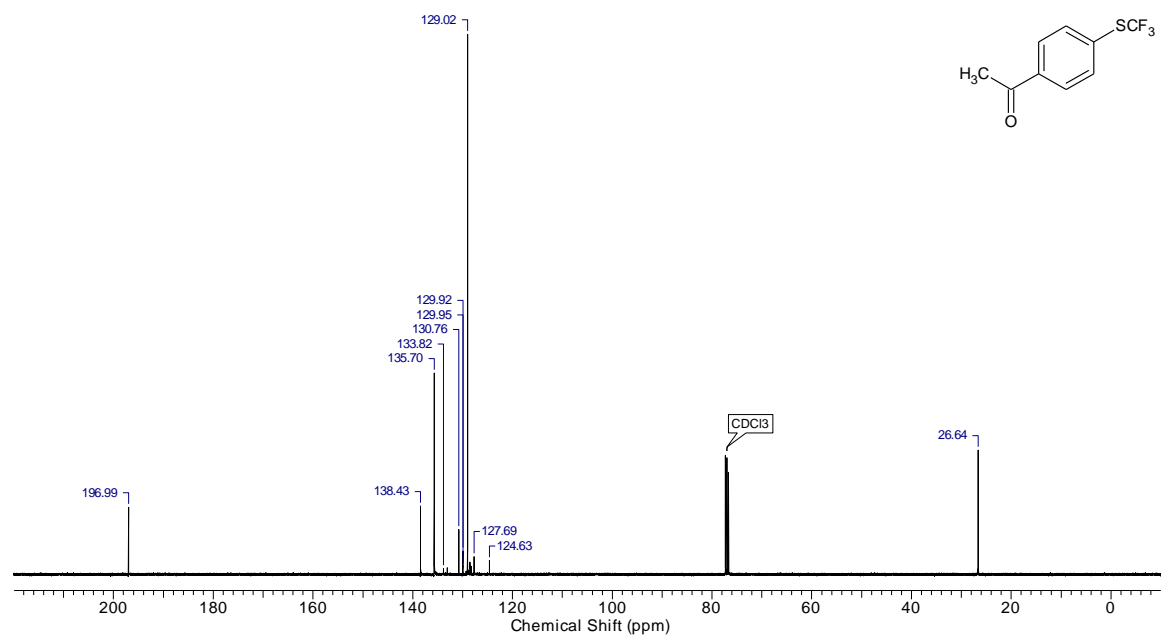

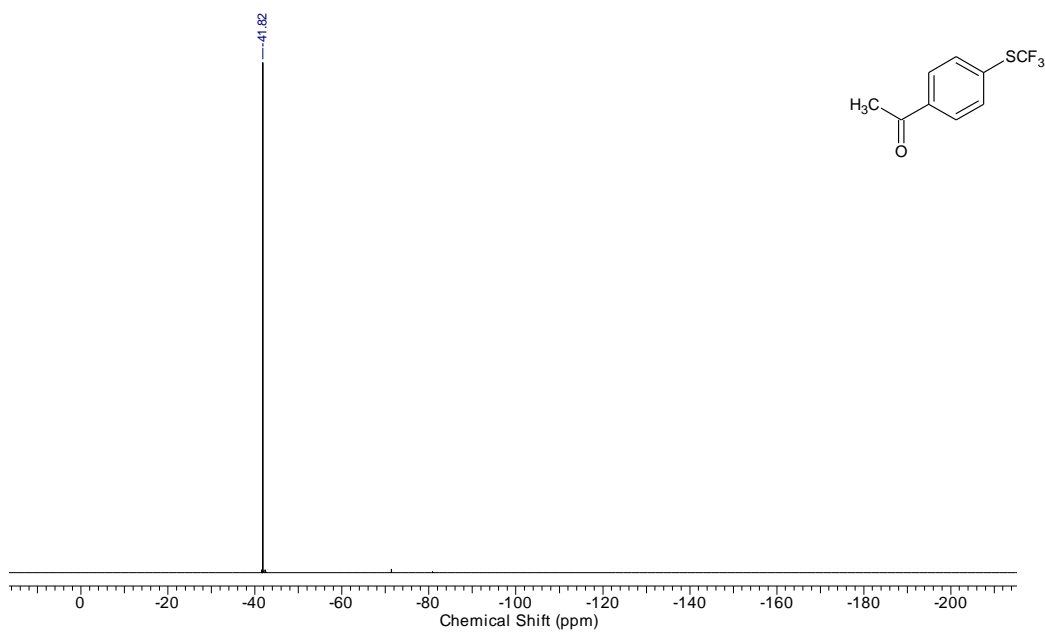

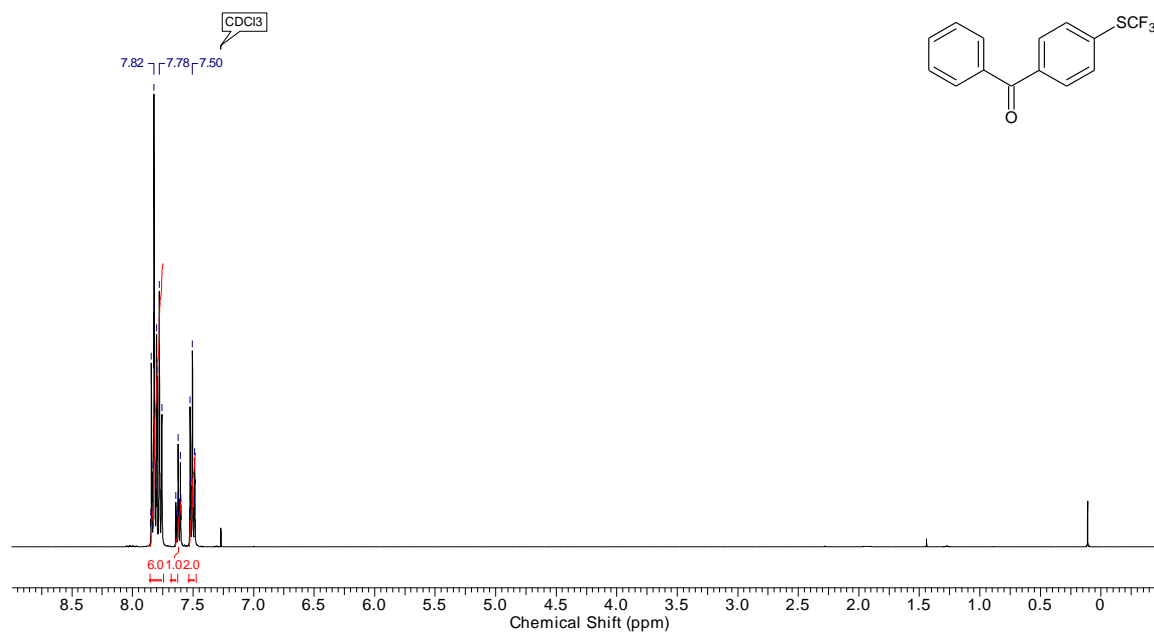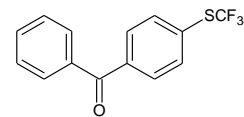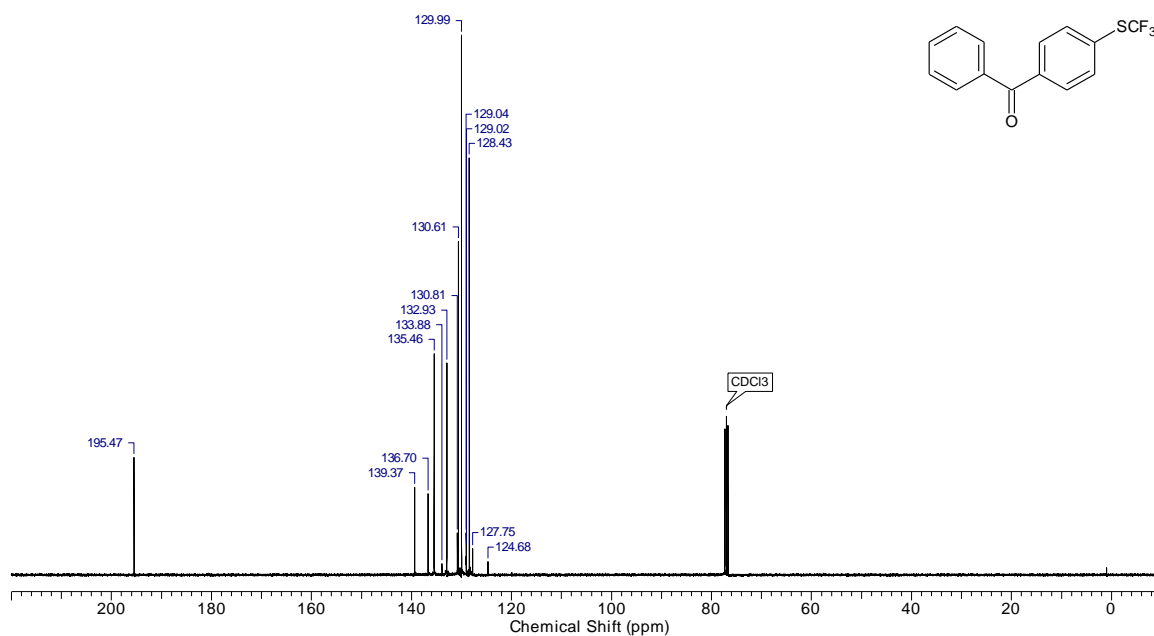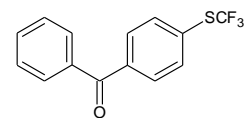

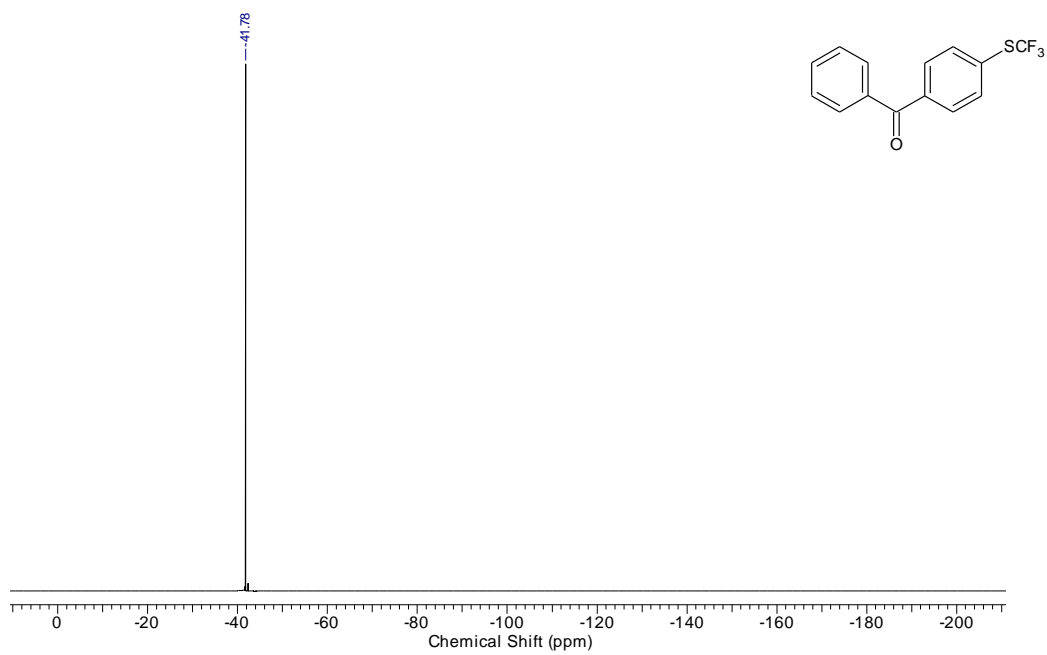

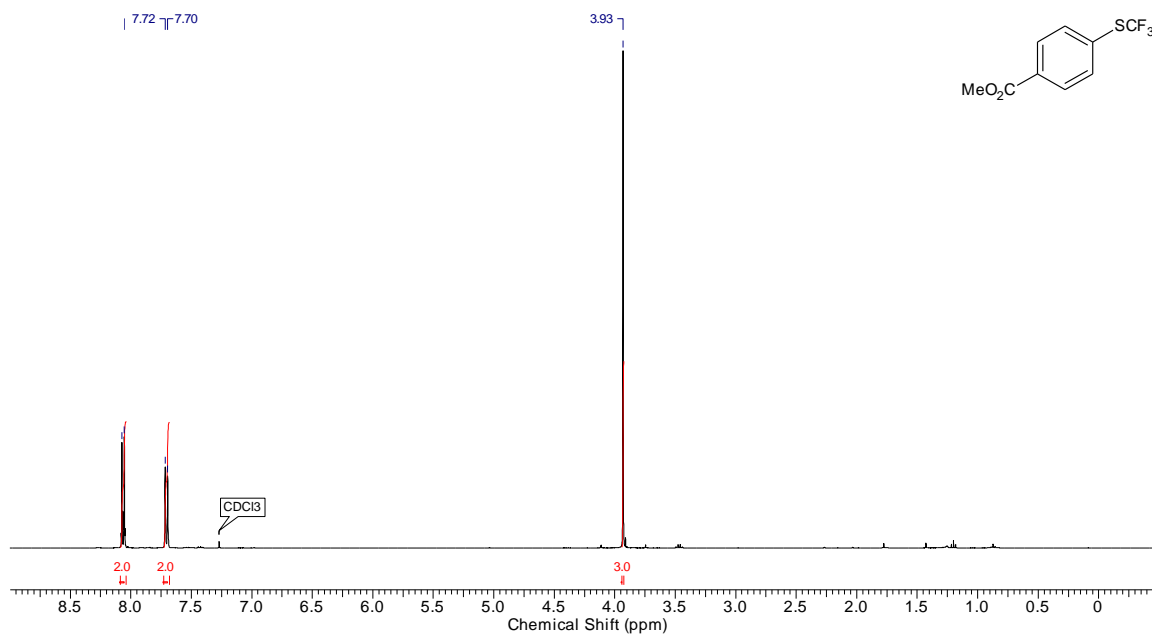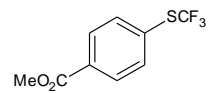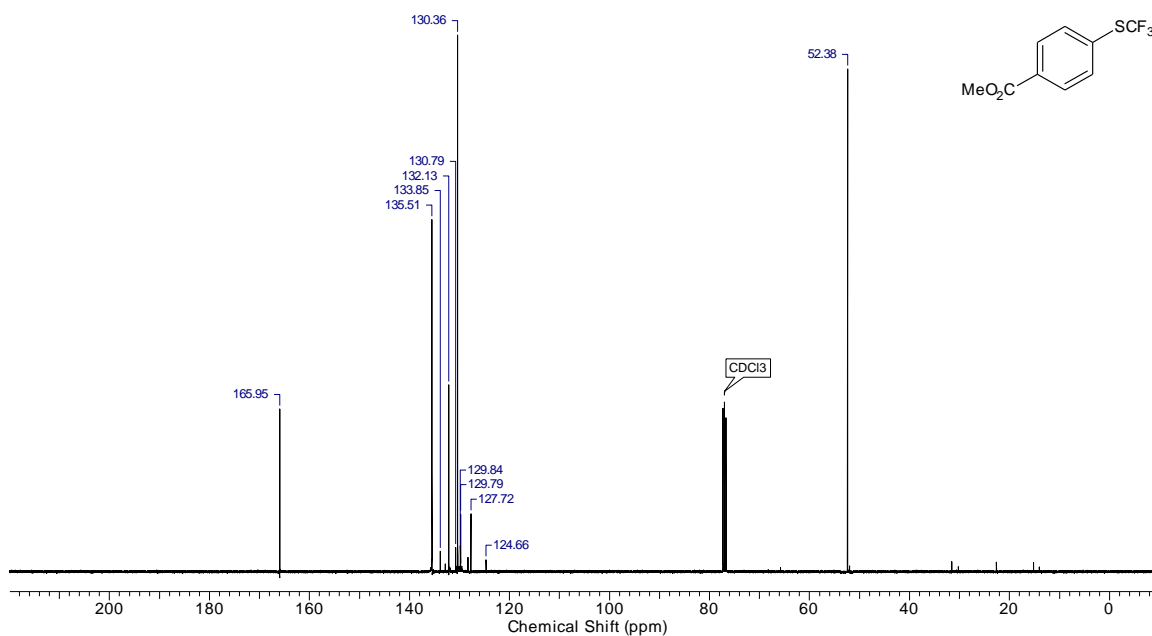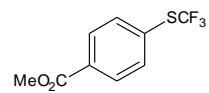

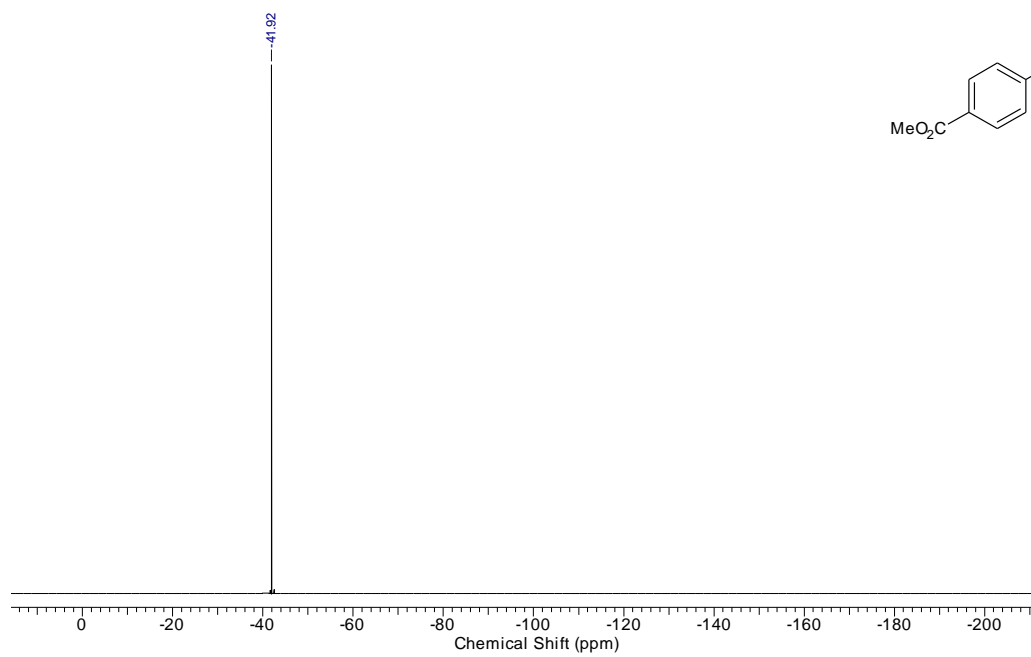

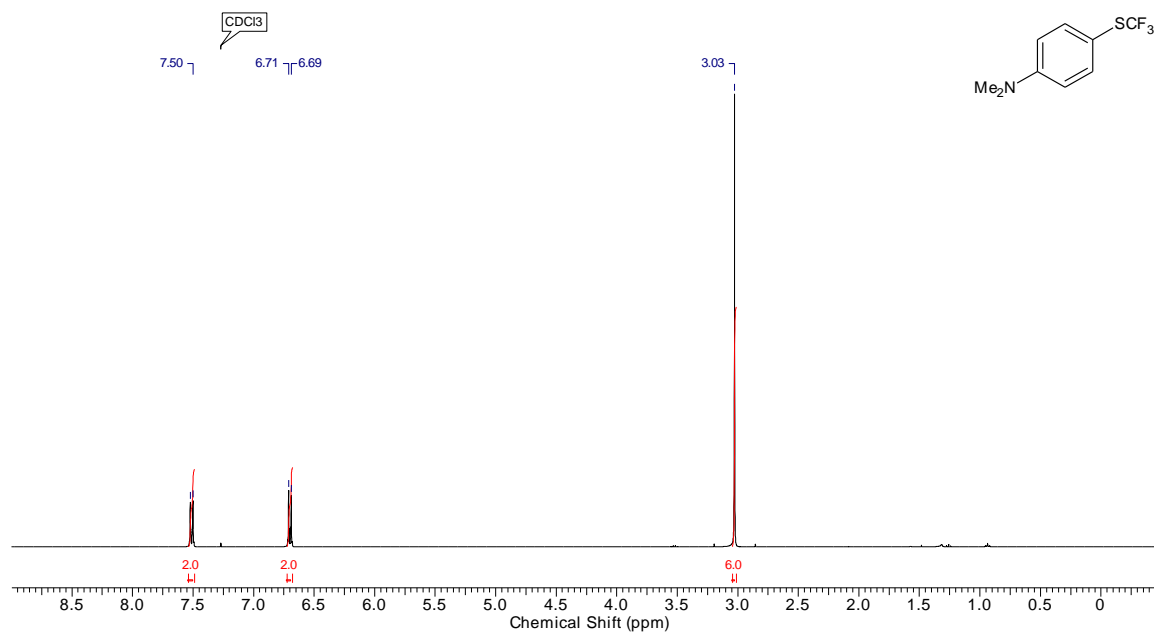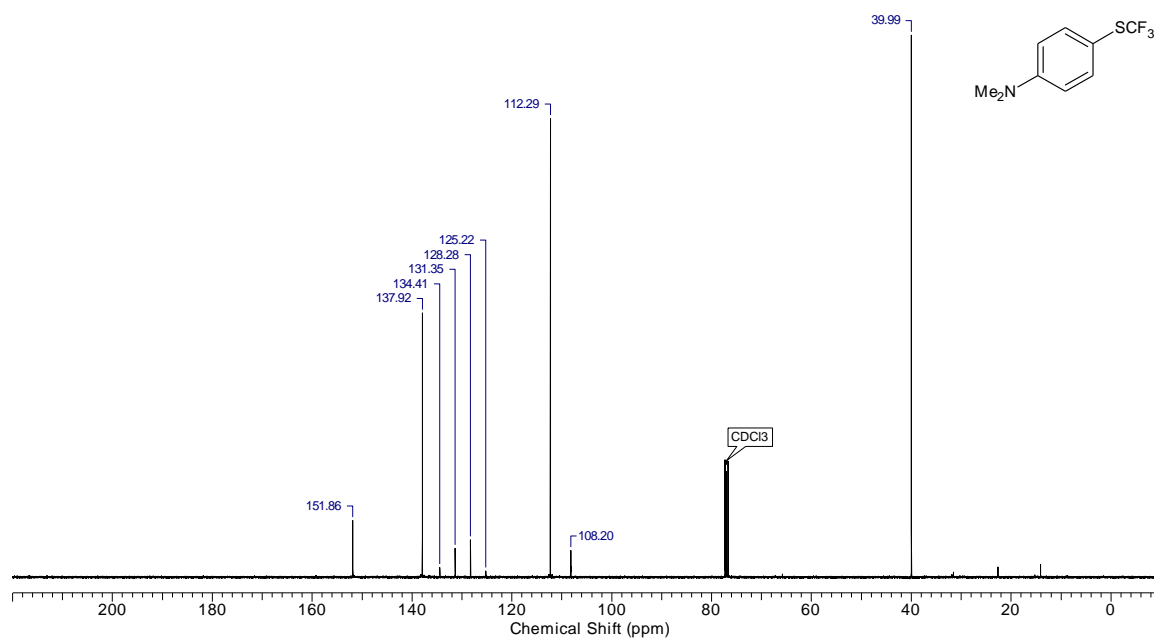



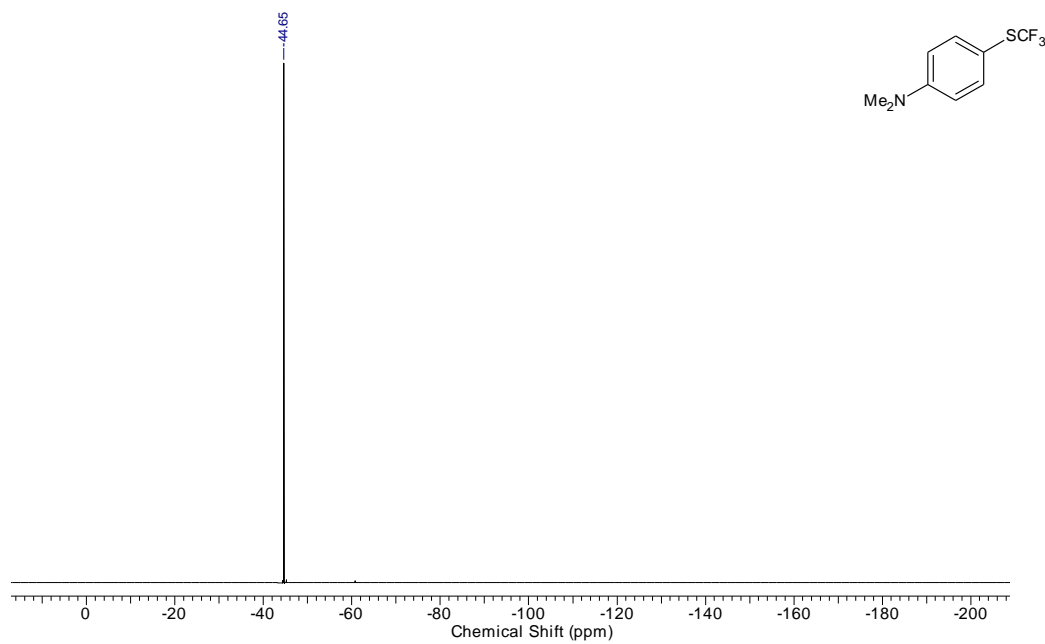

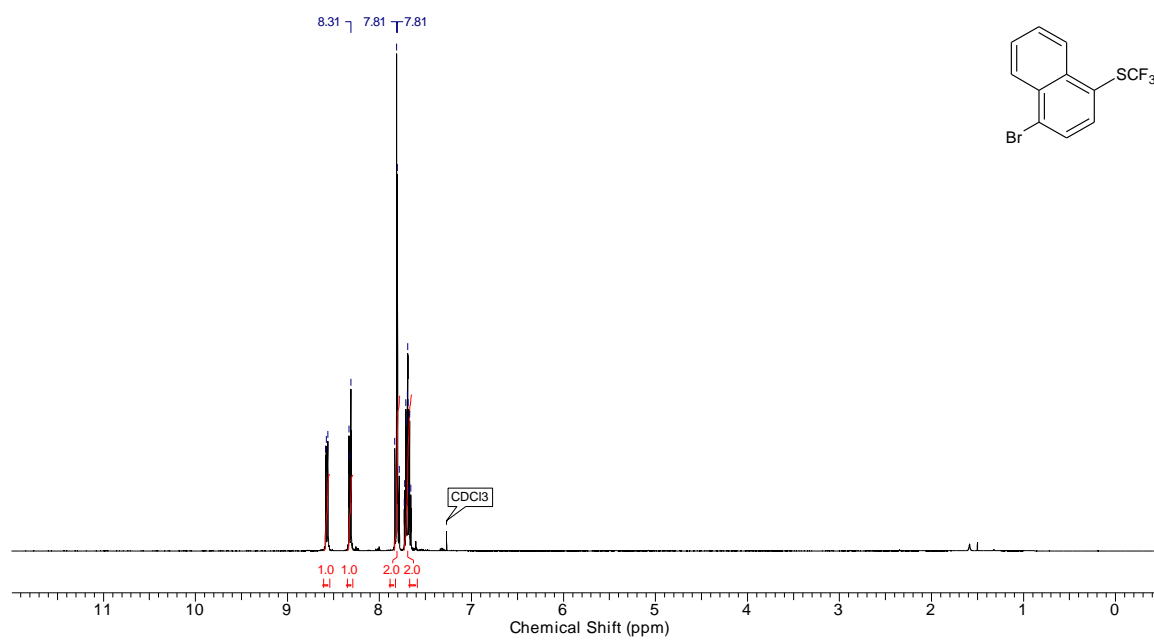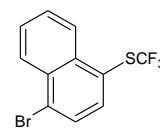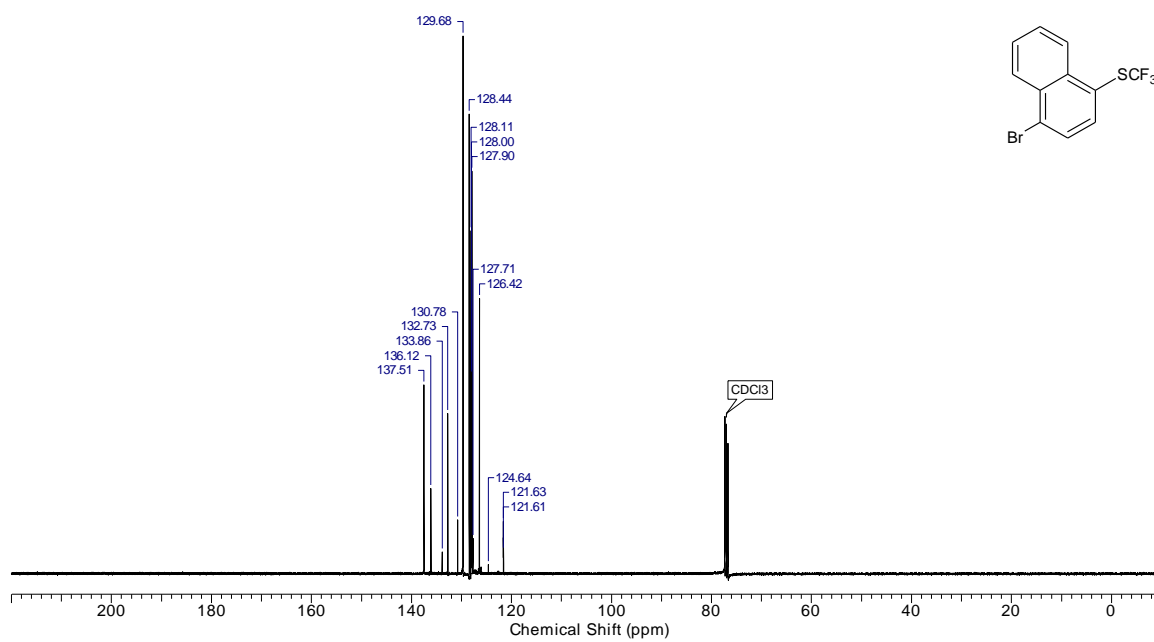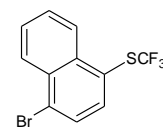

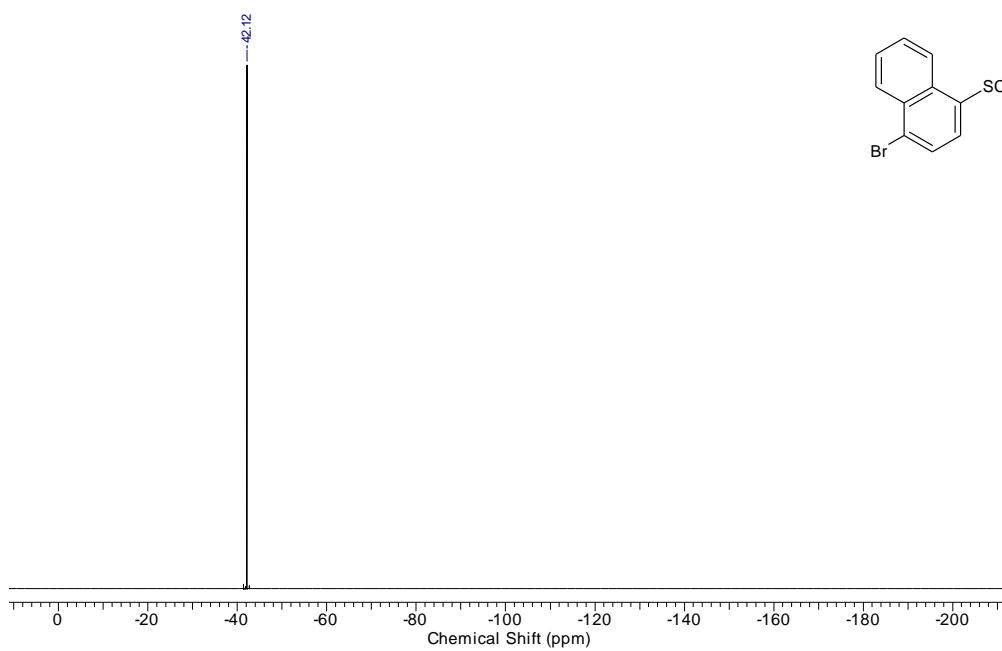

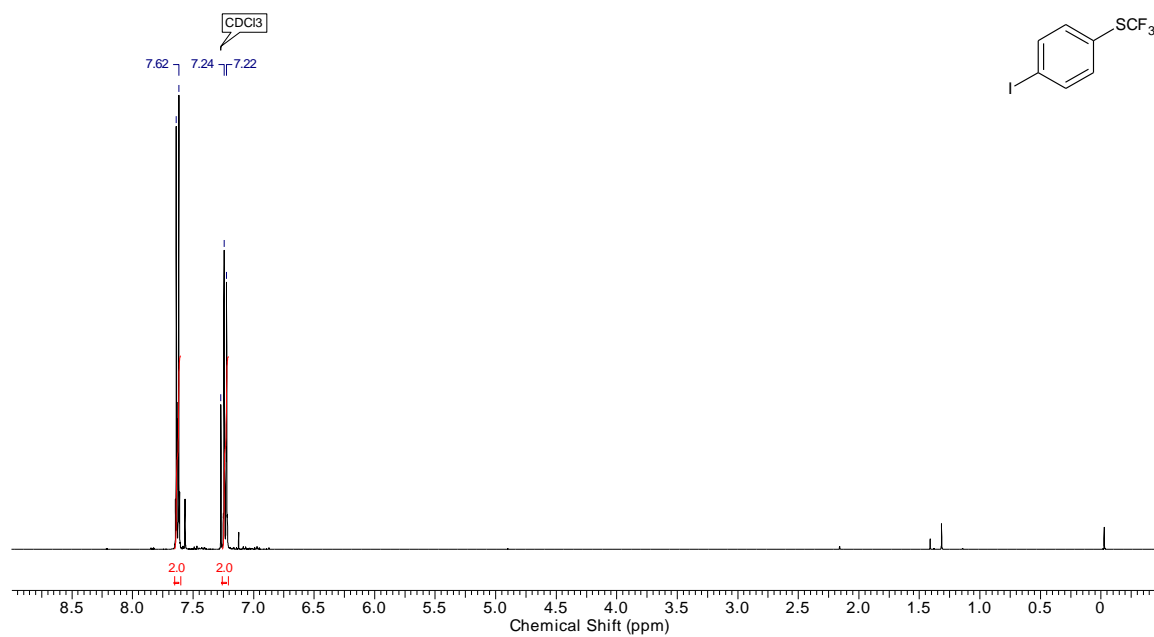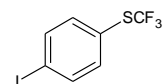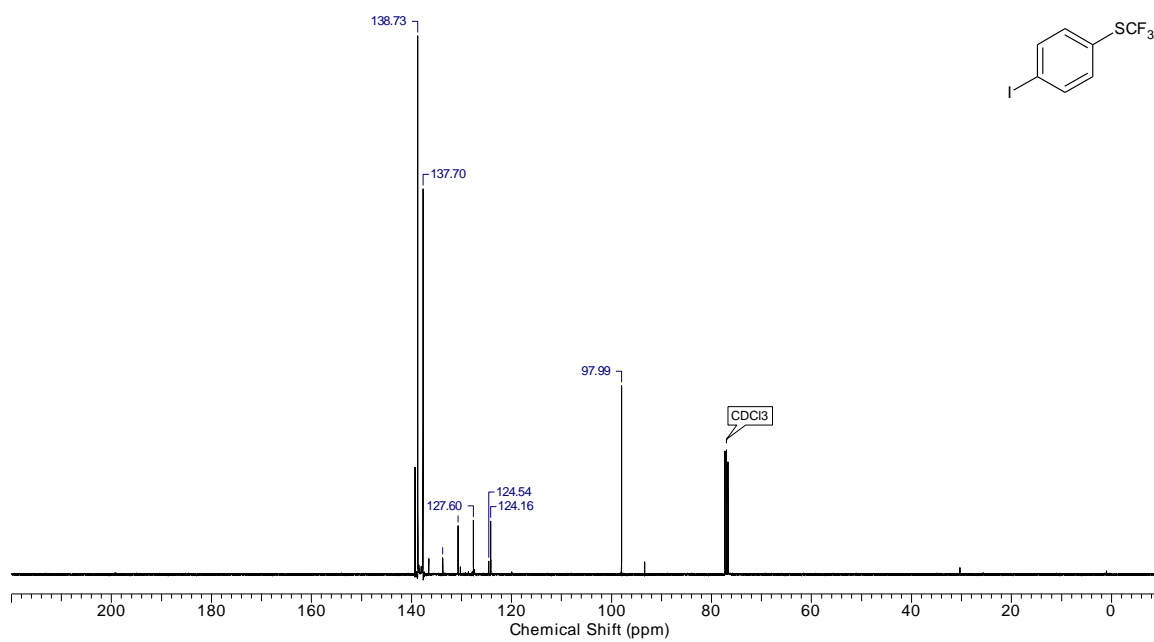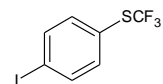

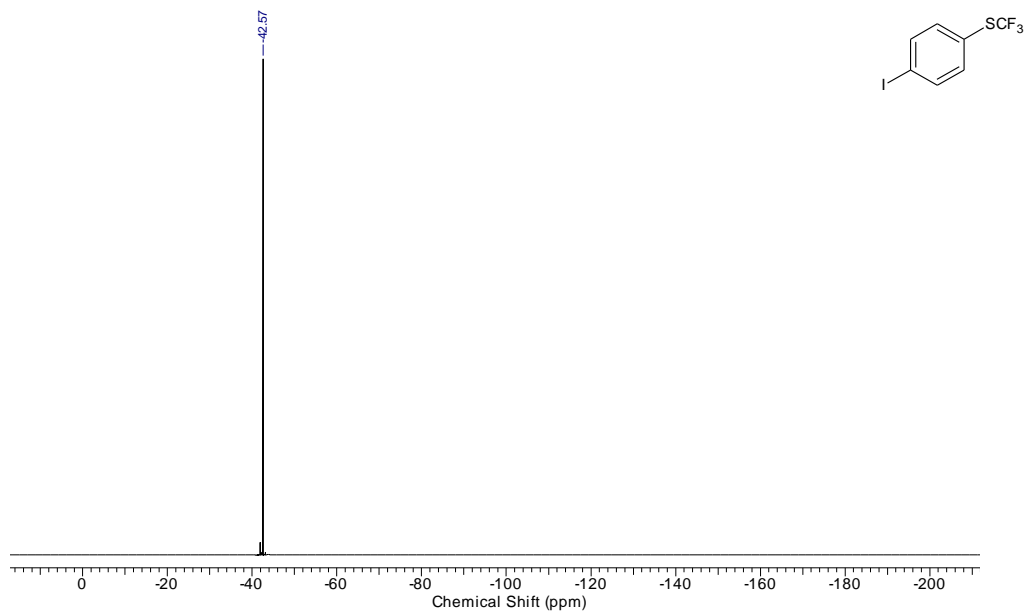

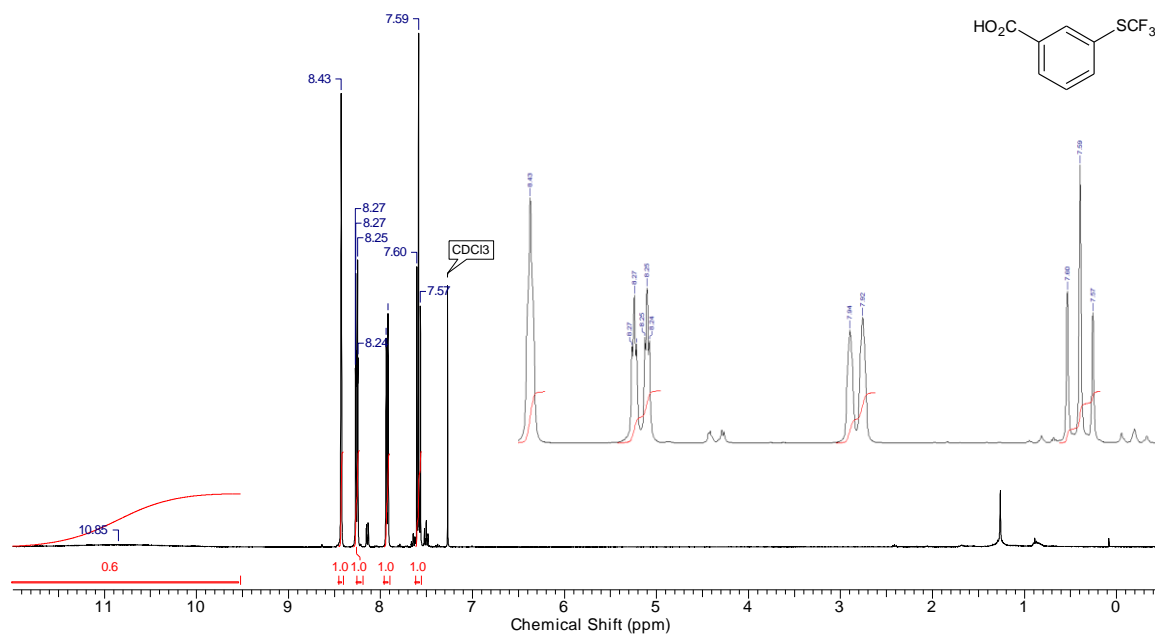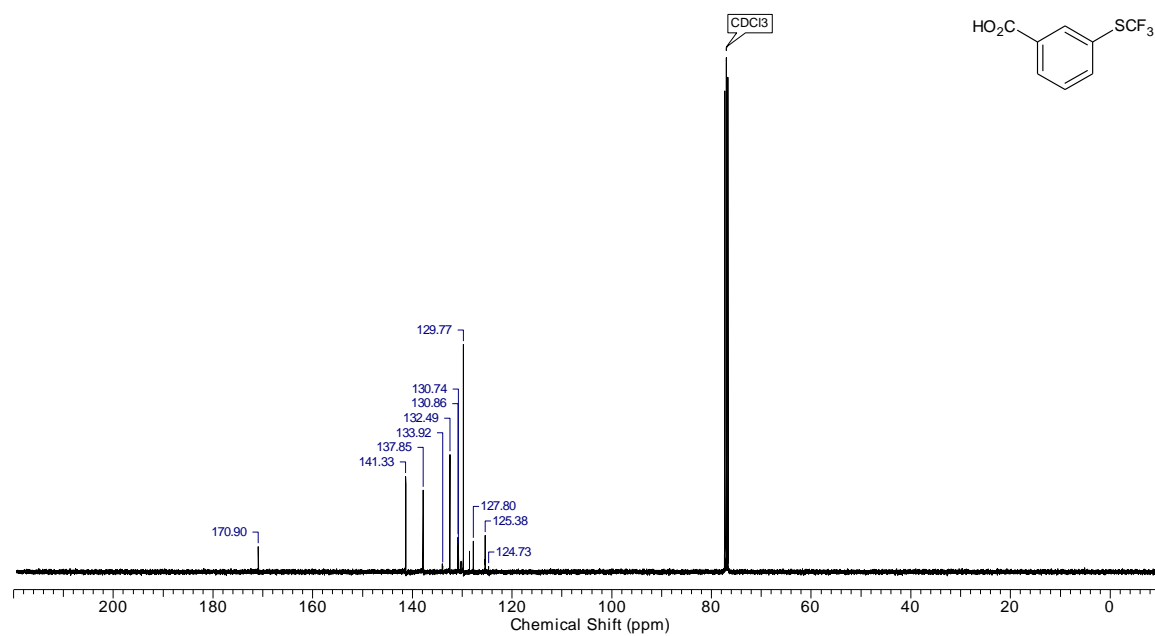

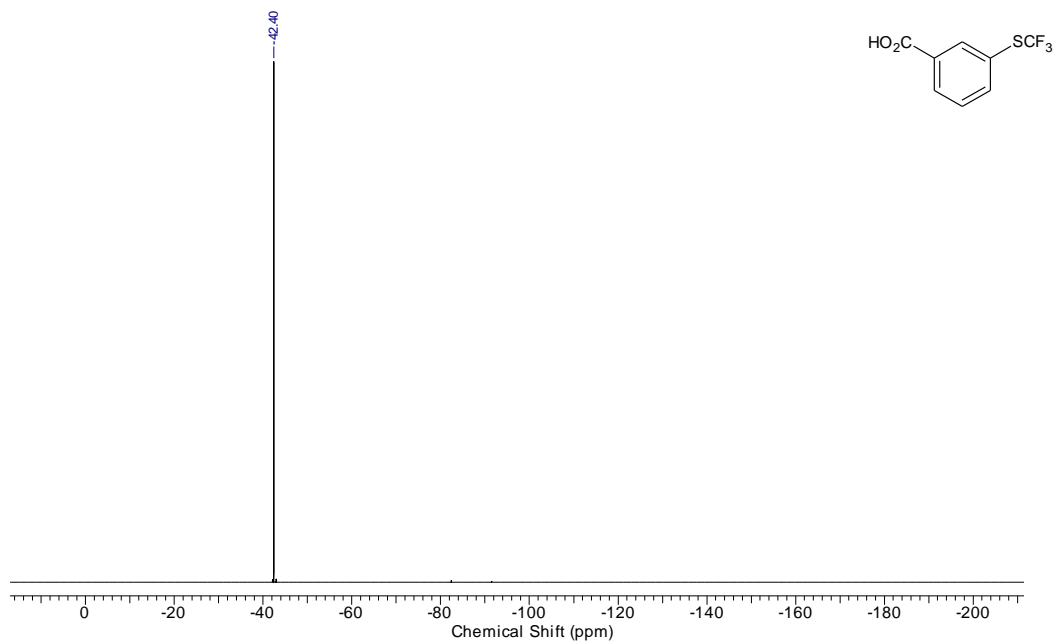

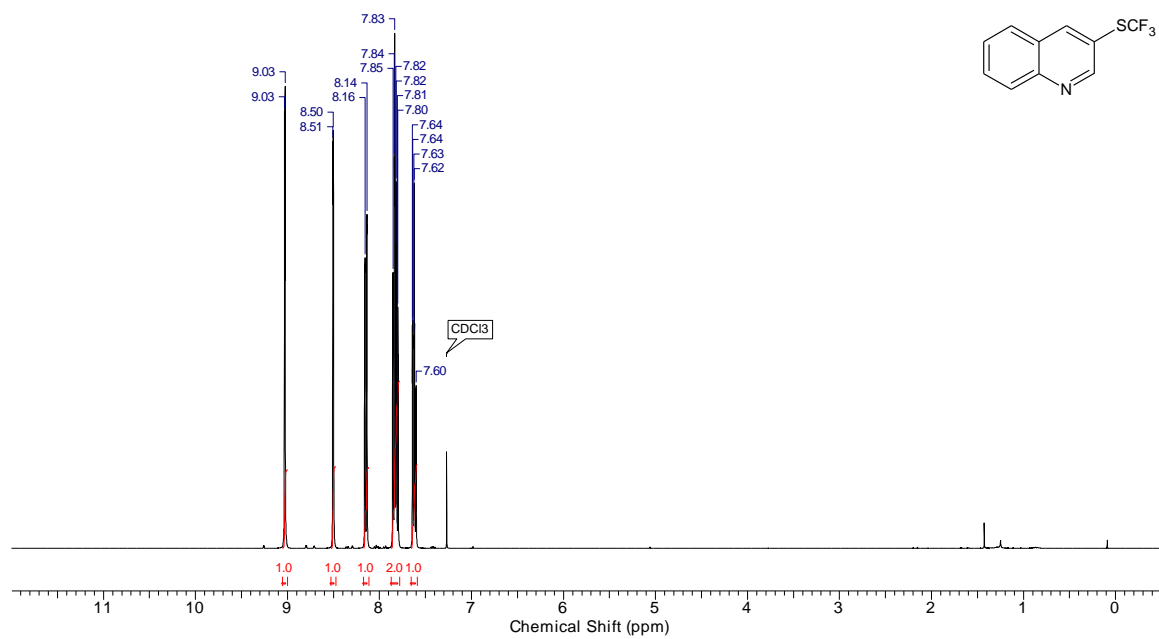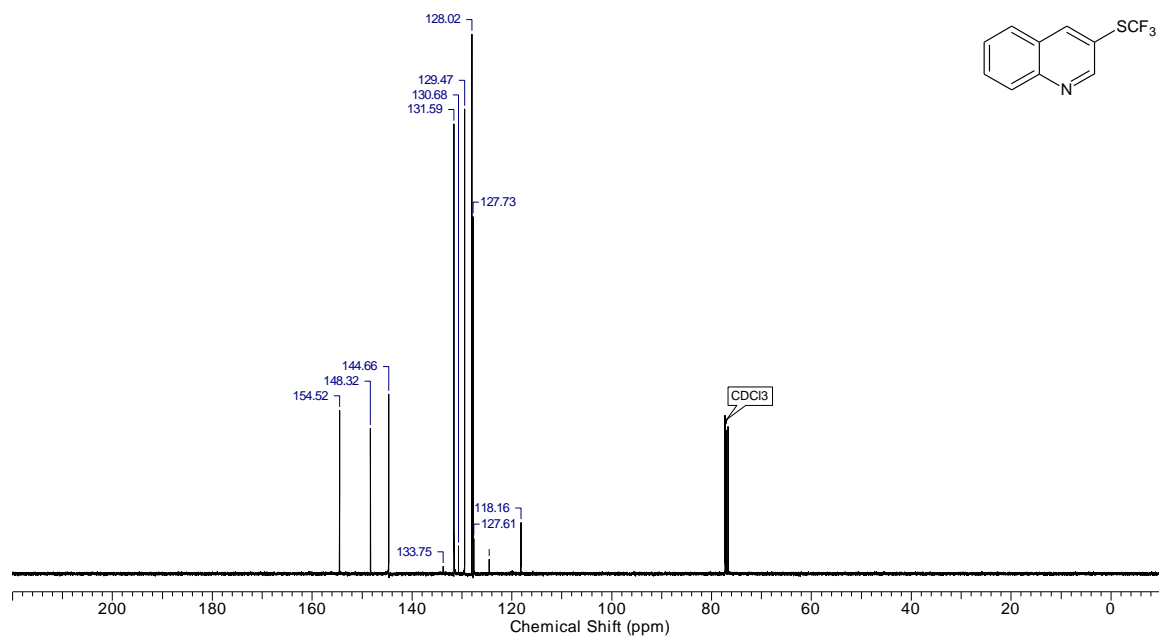



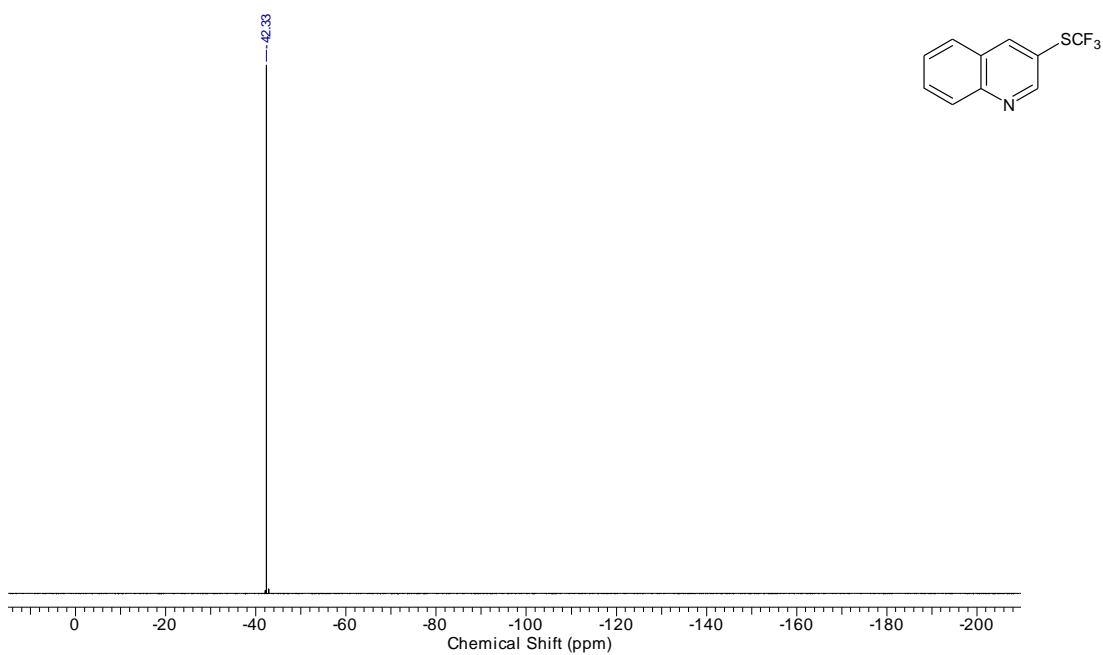

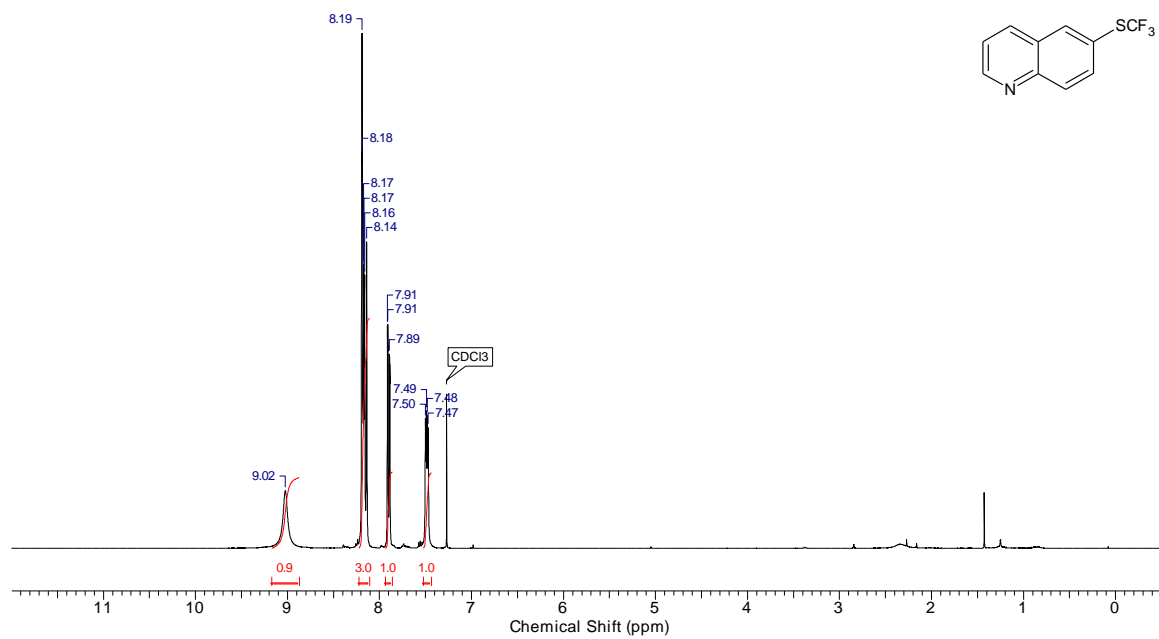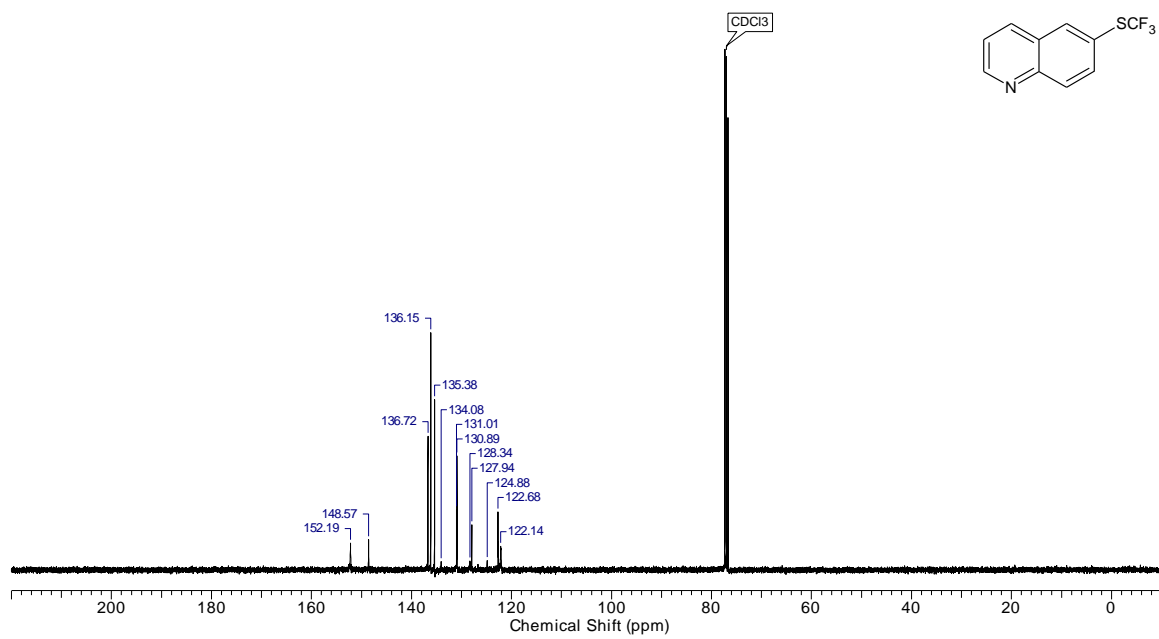

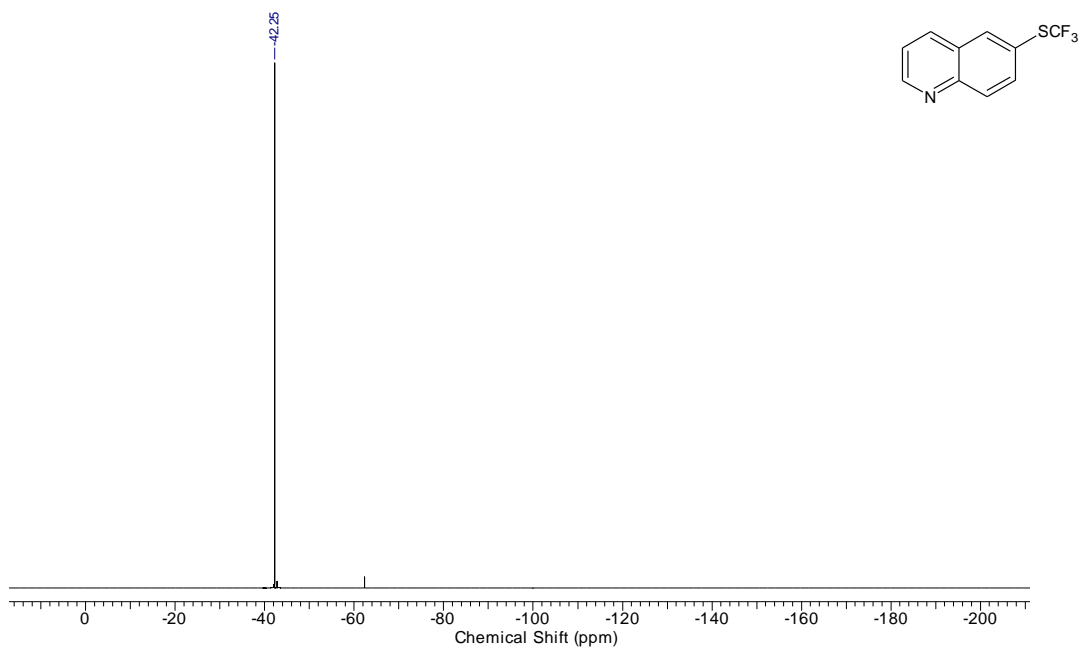

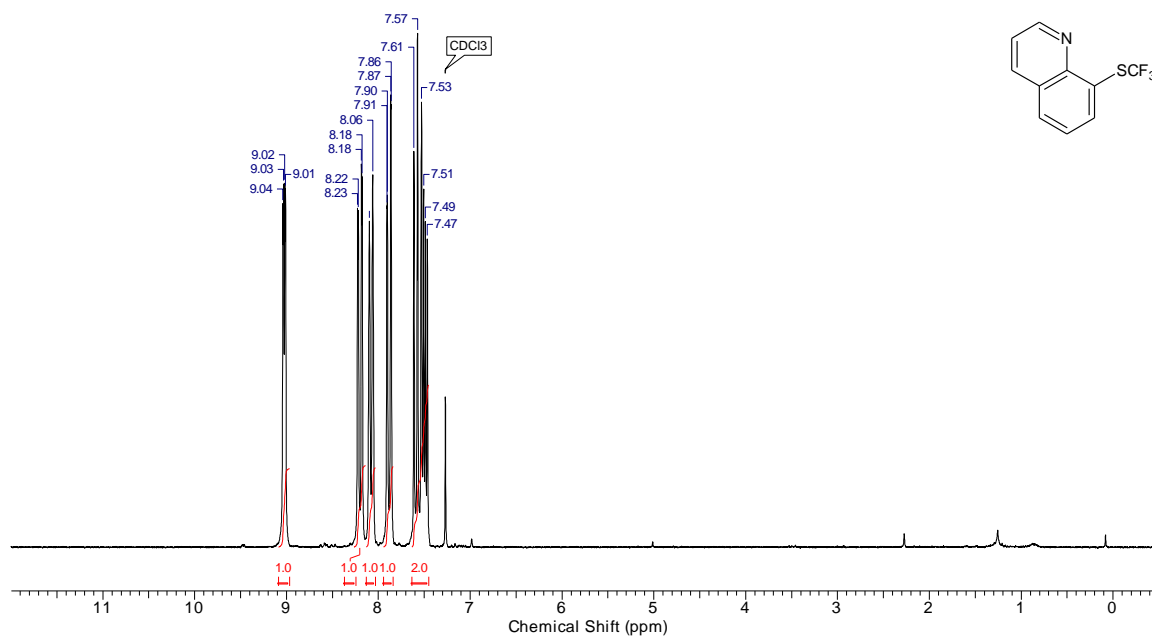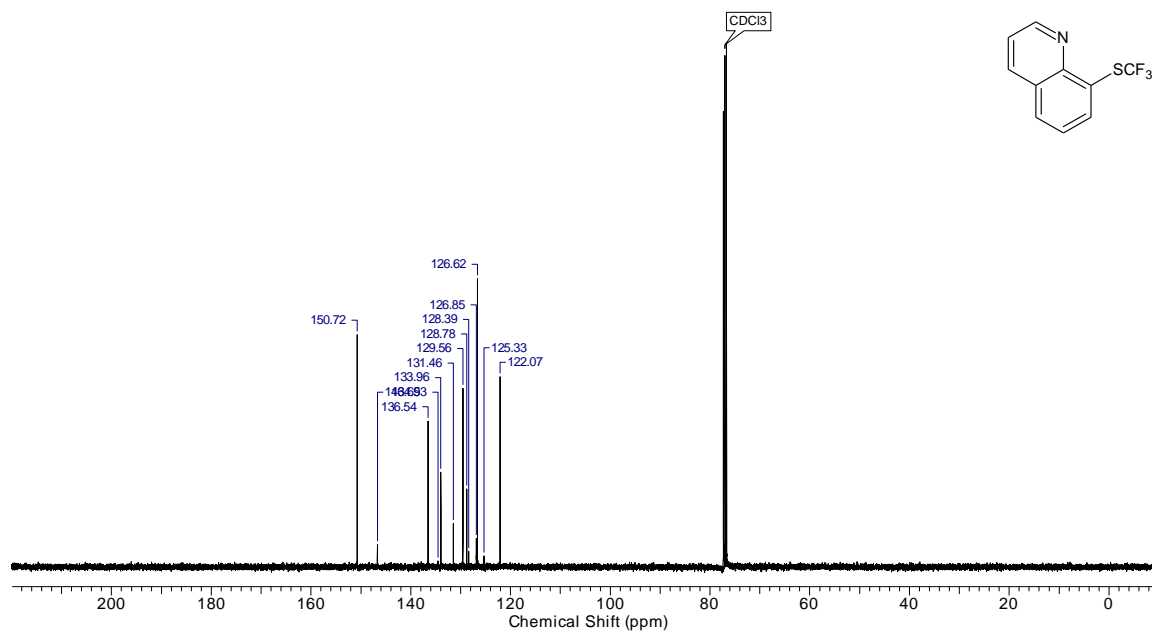

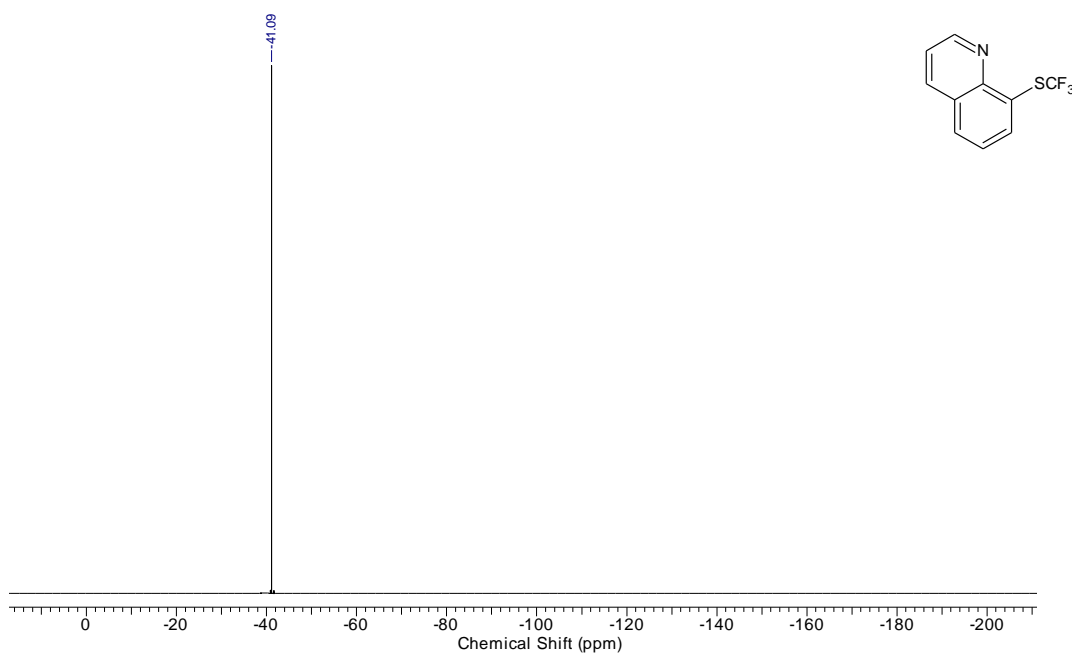

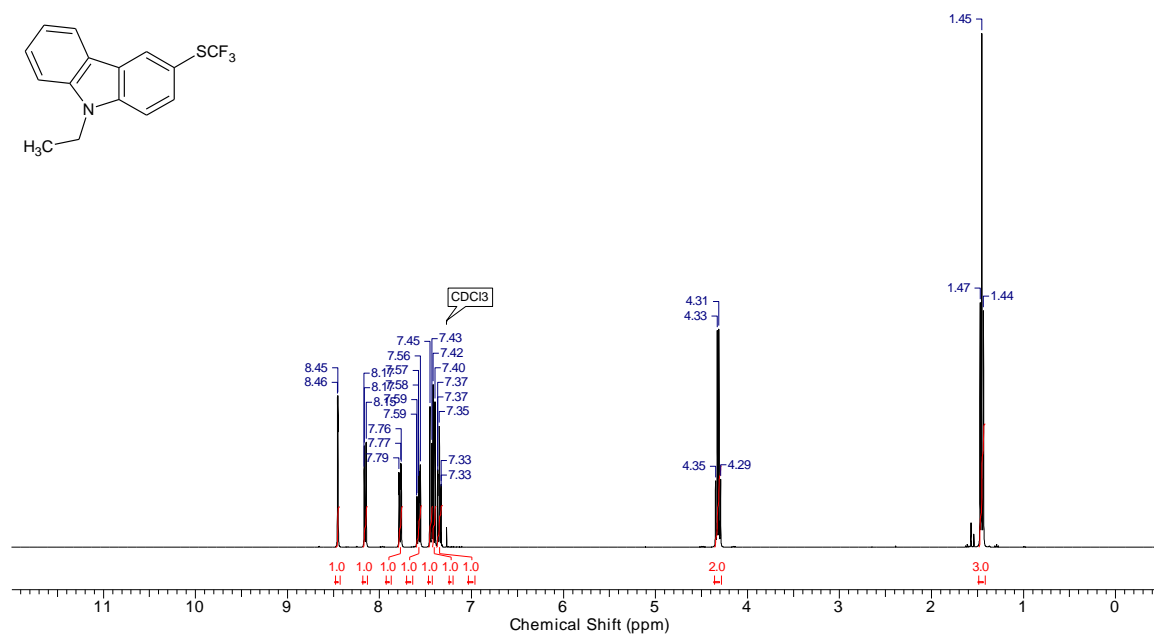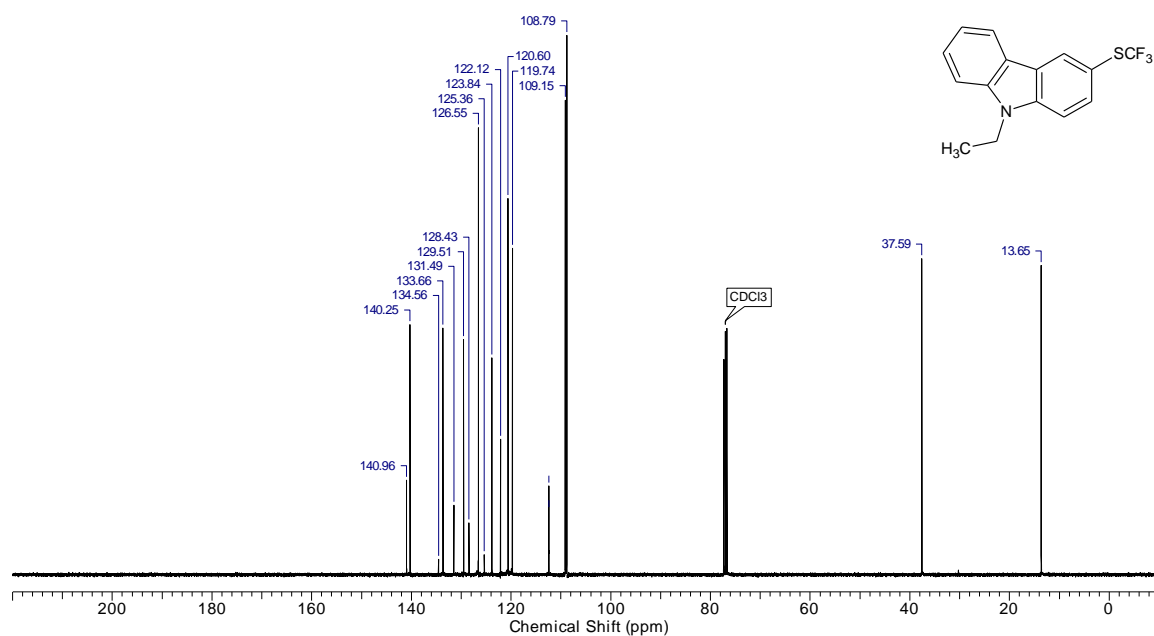

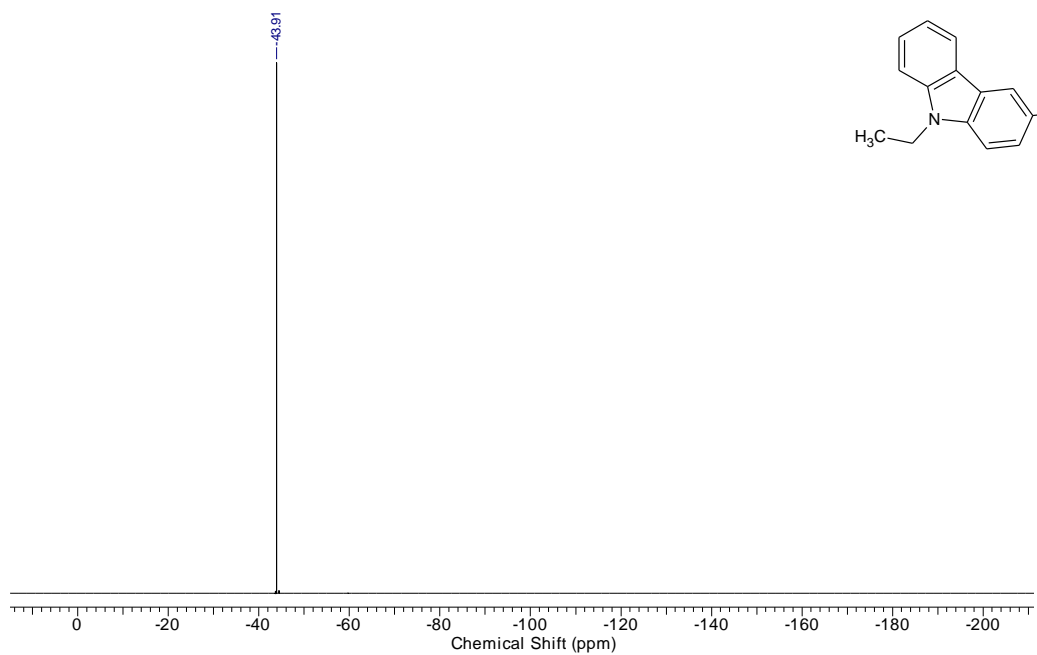

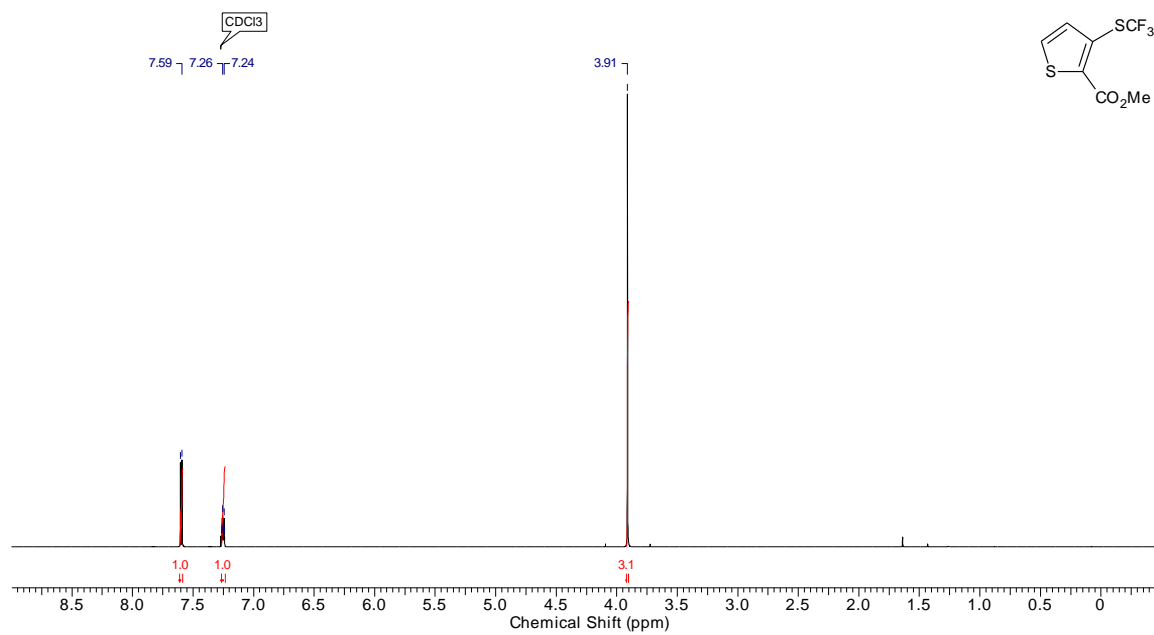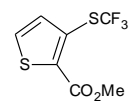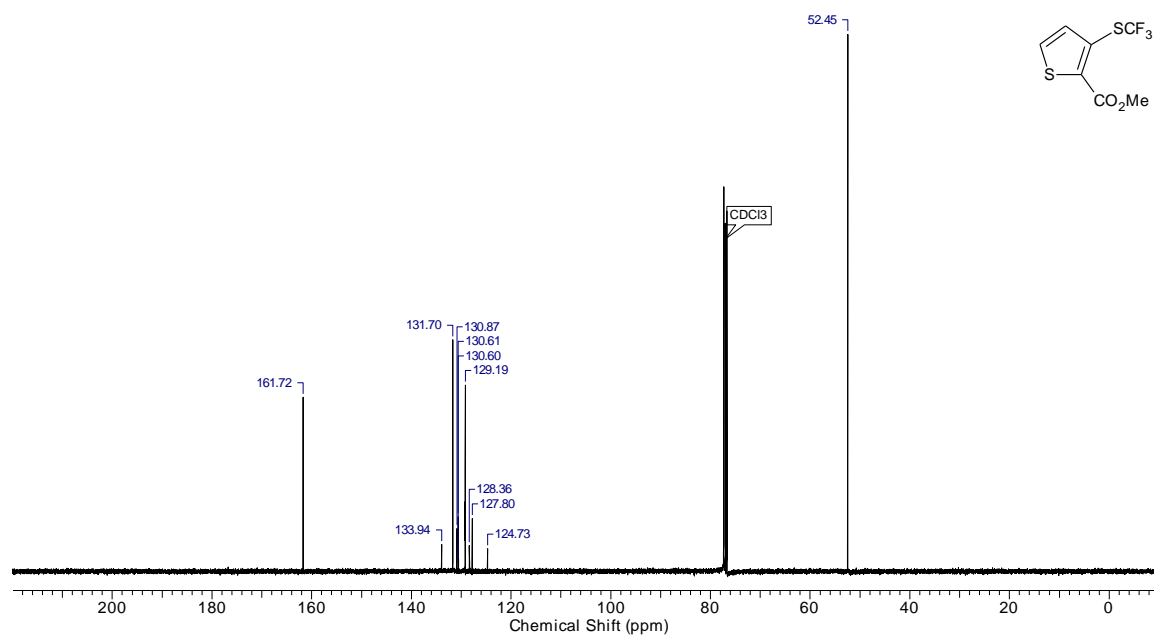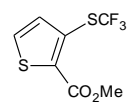



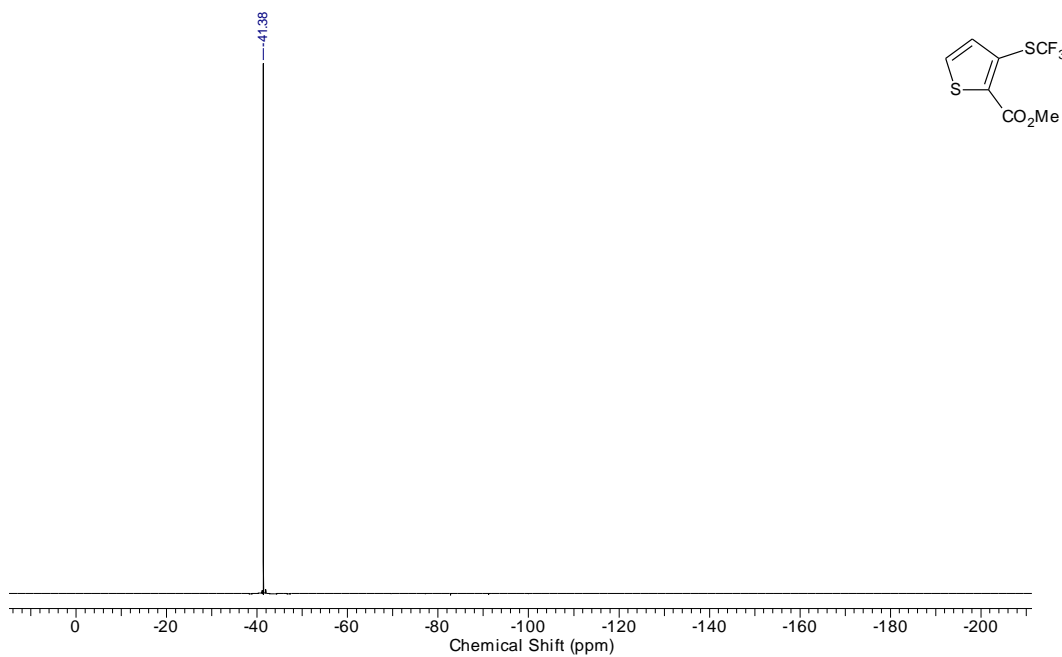

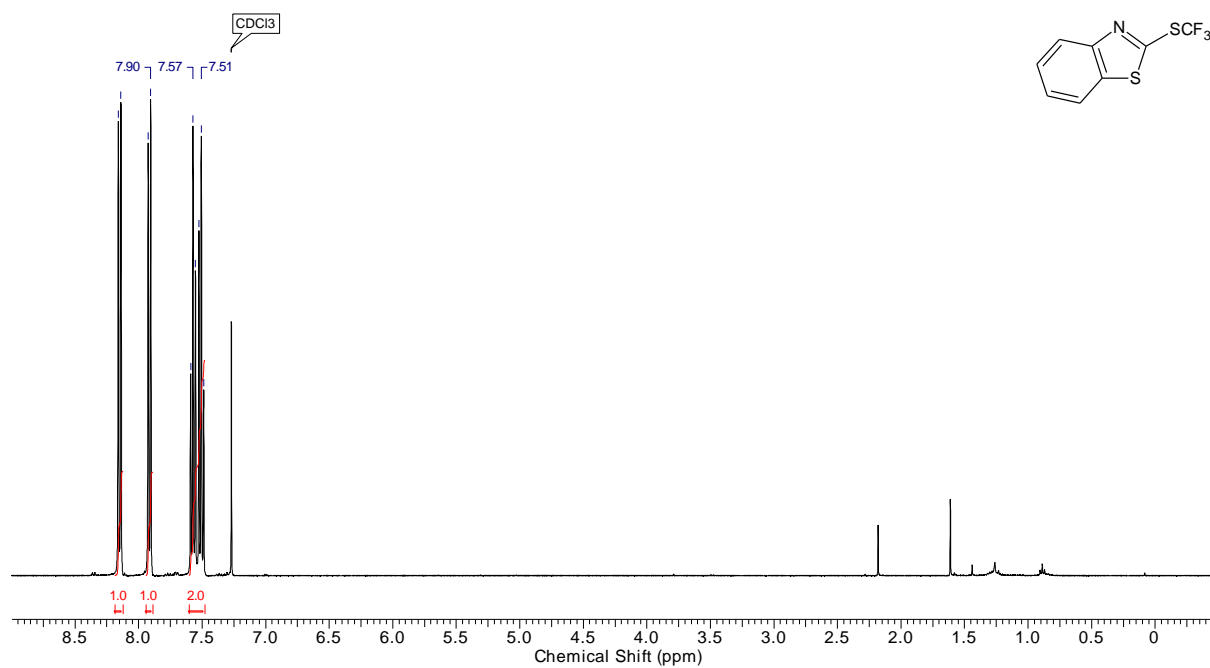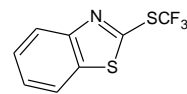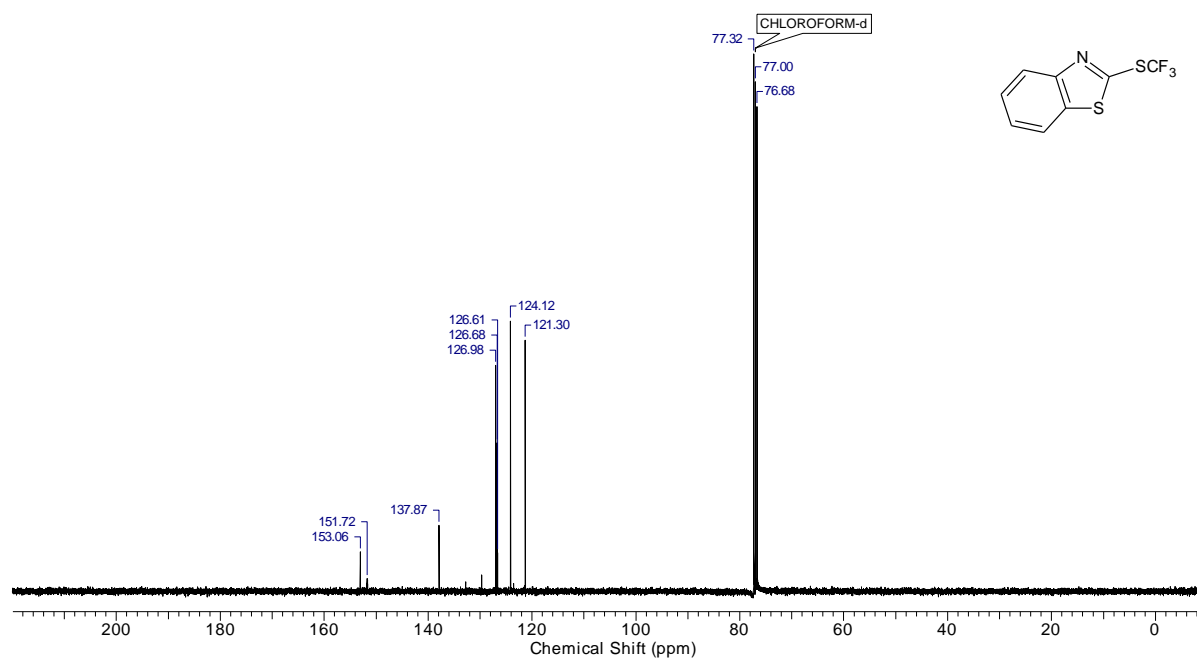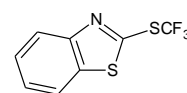

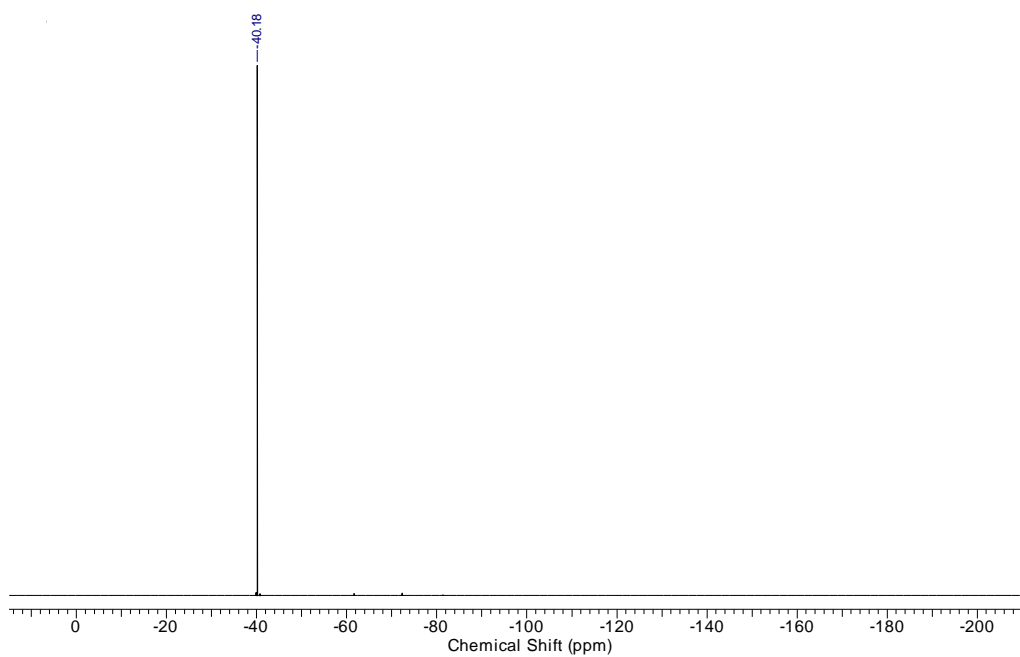

<sup>1</sup> V. V. Shaburov, O. V. Vasil'eva, A. V. El'tsov, *Chemistry of Heterocyclic Compounds*, 1974 , **10**, 320.
